1     **Precise and versatile microplate reader-based analyses of biosensor signals**  
2                                     **from arrayed microbial colonies**

3

4     Fabian S. F. Hartmann<sup>1, #</sup>, Tamara Weiß<sup>1, #</sup>, Louise L. B. Kastberg<sup>1</sup>, Christopher T. Workman<sup>1</sup>,  
5                                     Gerd M. Seibold<sup>1\*</sup>

6

7

8     <sup>1</sup>Section for Synthetic Biology, Department Bioengineering, Technical University of Denmark (DTU),  
9     Lyngby, Denmark

10    #These authors have contributed equally to this work and share first authorship

11

12

13

14    \***Correspondence:** Gerd M. Seibold, Section of Synthetic Biology, Department of Biotechnology and  
15    Biomedicine, Technical University of Denmark, Søtofts Plads Building 223, DK-2800, Kongens Lyngby,  
16    Denmark; e-mail: [gesei@dtu.dk](mailto:gesei@dtu.dk)

17

18

19    **Keywords:** Lab-automation, Mrx1-roGFP2, mCherry, GFP, arrayed microbial colonies, genetically  
20    encoded biosensors

21

22

## 23 **Abstract**

24 Genetically encoded fluorescent biosensors have emerged as a powerful tool to support phenotypic  
25 screenings of microbes. Optical analyses of fluorescent sensor signals from colonies grown on solid  
26 media can be challenging as imaging devices need to be equipped with appropriate filters matching the  
27 properties of fluorescent biosensors. Towards versatile fluorescence analyses of different types of  
28 biosensor signals derived from arrayed colonies, we investigate here the use of monochromator  
29 equipped microplate readers as an alternative to imaging approaches. Indeed, for analyses of the LacI-  
30 controlled expression of the reporter mCherry in *Corynebacterium glutamicum*, or promoter activity  
31 using GFP as reporter in *Saccharomyces cerevisiae*, an improved sensitivity and dynamic range was  
32 observed for a microplate reader-based analyses compared to their analyses *via* imaging. The microplate  
33 reader allowed us to capture signals of ratiometric fluorescent reporter proteins (FRPs) with a high  
34 sensitivity and thereby to further improve the analysis of internal pH via the pH-sensitive FRP  
35 mCherryEA in *Escherichia coli* colonies. Applicability of this novel technique was further demonstrated  
36 by assessing redox states in *C. glutamicum* colonies using the FRP Mrx1-roGFP2. By the use of a  
37 microplate reader, oxidative redox shifts were measured in a mutant strain lacking the non-enzymatic  
38 antioxidant mycothiol (MSH), indicating its major role for maintaining a reduced redox state also in  
39 colonies on agar plates. Taken together, analyses of biosensor signals from microbial colonies using a  
40 microplate reader allows comprehensive phenotypic screenings and thus facilitates further  
41 development of new strains for metabolic engineering and systems biology.

42

43

44

## 45 **1 Introduction**

46 Phenotypic screening of microbial strain libraries for interesting genetic variants underlies many current  
47 investigations ranging from analyses of gene functions in basic research on microbial physiology to high-  
48 throughput genetic engineering of tailor-made biotechnological platform organisms<sup>1-4</sup>. In the best case  
49 scenario the trait of interest is directly coupled to a phenotypic output such as growth and/or formation  
50 of a natural chromophore or fluorophore<sup>5</sup> allowing the easy identification of the strains of interest<sup>6</sup>.  
51 However, target phenotypes often cannot easily be detected and laborious analytical methods such as  
52 HPLC-analyses of metabolite levels would be required to identify interesting candidates. In these cases,  
53 genetically encoded biosensors have emerged as a valuable tool to facilitate high-throughput  
54 screenings. Such biosensors provide the advantage that an intracellular signal is transduced into an  
55 output signal, which can easily be measured from each strain of a library in a high-throughput manner<sup>7,8</sup>.  
56 Organisms naturally possess a variety of different types of sensors to monitor the intra- or extracellular  
57 accumulation of small molecules, ions, or changes in physical parameters. By applying synthetic biology  
58 tools, these properties can be harnessed to develop biosensors for high-throughput screenings<sup>9</sup>.  
59 Transcription factor-based biosensors (TFBs) represent some of the most common types of biosensors  
60 applied which are often based on metabolite-sensing transcription factors. Upon interacting with  
61 effector molecules, the expression of an actuator gene, such as a fluorescent protein, is controlled<sup>10,11</sup>.  
62 In contrast to TFBs, fluorescent reporter proteins (FRPs) act both as sensor and actuator. FRPs can  
63 undergo conformational changes upon interaction with a target metabolite or change in physiological  
64 state, which is subsequently accompanied by a change in their intrinsic fluorescence characteristics<sup>12,13</sup>.  
65 To date, many different TFBs and FRPs are available for measuring a broad range of internal metabolites  
66 or physiological states in microbial cells<sup>12-18</sup>.

67 Besides the selection of specific biosensors for the screening of strain libraries, the experimental set-up  
68 also represents a major determinant to be considered for an efficient screening method. High-

69 throughput analysis of microbial libraries can be conducted in well-plates, on agar plates, via  
70 fluorescence-activated cell sorting (FACS), or droplet-based screening <sup>7</sup>. Compared to FACS or droplet-  
71 based screening approaches, screenings conducted in well-plates and on agar plates significantly lowers  
72 the throughput that can be achieved. However, it provides the advantage that biosensor signals from  
73 tested strain can be directly compared under various conditions <sup>19</sup>. Agar plate screens are considered as  
74 less laborious and provide a slightly higher throughput when compared to well-plate screens. However,  
75 agar plate screenings are dependent on optical readouts using camera-based imaging systems<sup>7</sup>. As  
76 supplier-specific filters for excitation and emission are required, the flexibility for assessing different  
77 fluorescent signals is low <sup>7</sup>. Furthermore, the fixed position of light sources and camera in the imaging  
78 system affects sensitivity and might cause shadow-effects dependent of the location of the colony on  
79 the agar plate <sup>20</sup>. In contrast, multimode plate readers equipped with monochromators and  
80 photomultipliers, commonly applied for well-plate screenings, offer a high flexibility, sensitivity, and  
81 easy adaptation of reader properties to the respective biosensor applied.

82 Despite the aforementioned challenges, we successfully applied the ratiometric FRP mCherryEA  
83 biosensor to visualize the internal pH of *E. coli* colonies growing on agar plates measured by a FUSION FX  
84 (Vilber) imaging system<sup>8</sup>. To adequately capture the ratiometric biosensor signals, the imaging system  
85 was equipped with two capsules (excitation laser and filter module) for excitation (530 nm and 440 nm)  
86 and a filter for capturing the emission (595 nm) of the pH-sensitive mCherry variant mCherryEA<sup>8</sup>.

87 The visualization of other biosensor signals (i.e. the redox biosensor protein Mrx1-roGFP2 with an  
88 excitation at 380 nm and 470 nm/ and an emission at 510 nm<sup>16</sup>) requires that the imaging system set-up  
89 is adapted to the properties of the applied fluorescent protein. Thus, applying another fluorescent  
90 protein is not readily possible if such appropriate filter modules are not available. This limitation also  
91 extends to most of the widely applied imaging systems for microbial colonies, as most cannot be

92 equipped with varying and/or multiple fluorescence filter modules, and thus cannot be used to capture  
93 ratiometric fluorescence signals.

94 Recently, a standard microplate reader was applied as a tool for image-based real-time gene expression  
95 analysis using TFBs in living cells growing on the surface of solid media<sup>21</sup>. By scanning the surface of  
96 rectangle OmniTray plates, fluorescence signals from organisms growing on agar allowed for imaging  
97 with different resolutions (highest resolution = 360 × 240)<sup>21</sup>. During phenotypic screenings on agar  
98 plates, strains are typically pinned from a 96-well source plate as an array of 96, 384, or 1536 colonies  
99 on rectangular OmniTray plates<sup>19</sup>. Therefore, the positions of the arrayed colonies on the agar plates  
100 are identical to the typical array of wells on conventional microplates used in microplate readers. This  
101 prompted us to test standard microplate reader systems for their applicability to assess fluorescence  
102 signals from arrayed colonies on agar plates.

103 In this study we demonstrate the wide applicability of microplate reader-based system to measure  
104 fluorescence signals from arrayed colonies on agar plates. This method is shown for different types of  
105 biosensors including a TFB based on LacI for regulated mCherry expression in *C. glutamicum*, promoter-  
106 based biosensors using yeast enhanced GFP (yeGFP) as fluorescent reporter in *S. cerevisiae*, and the FRP  
107 mCherryEA to assess the internal pH in *E. coli* colonies. We further show that the method developed  
108 here enables the accurate measurement of redox states for *C. glutamicum* colonies via the ratiometric  
109 sensor protein Mrx1-roGFP2 on agar plates.

110

## 111 **2 Results and discussion**

### 112 **2.1 Microplate reader-based analysis of transcription factor-based biosensors in *C. glutamicum***

#### 113 **colonies on agar plates**

114 TFBs are widely used in microbial physiology, metabolic engineering, and synthetic biology. Many  
115 designs for TFBs include fluorescent proteins as a reporter, which provides an easy optical readout to  
116 screen for high or low fluorescent variants from a library. Genome wide screens are often conducted via  
117 arrayed colonies on agar plates, as this approach offers a higher capacity than well-plate based screens  
118 and the comparison of different conditions<sup>7</sup>. However, as stated above, analyses of fluorescence signals  
119 from colonies via imaging can be challenging<sup>22</sup>.

120 To compare fluorescence imaging with microplate reader-based measurements, two model strains,  
121 *C. glutamicum* (pEKEx2\_low-*mCherry*) and *C. glutamicum* (pEKEx2\_high-*mCherry*), were constructed to  
122 compare fluorescence imaging with microplate reader-based measurements. The two strains were  
123 transformed using plasmids pEKEx2\_low-*mCherry* and pEKEx2\_high-*mCherry*, both consisting of the IPTG  
124 inducible promoter P<sub>tac</sub> but differed in the strength of the ribosomal binding site (RBS) for expression of  
125 the reporter *mCherry* (Fig. 1a). To verify the different expression levels, *C. glutamicum* (pEKEx2\_low-  
126 *mCherry*) and *C. glutamicum* (pEKEx2\_high-*mCherry*) were cultivated in BHI liquid medium  
127 supplemented with different IPTG concentrations followed by endpoint fluorescence analysis using a  
128 microplate reader (SpectraMax). As depicted in Fig. 1b, both strains revealed an IPTG dose-dependent  
129 increase of the respective fluorescence intensity. As expected, the use of a stronger RBS in  
130 *C. glutamicum* (pEKEx2\_high-*mCherry*) resulted in a higher maximal *mCherry* fluorescence level when  
131 compared to *C. glutamicum* (pEKEx2\_low-*mCherry*). Moreover, no increased fluorescence levels were  
132 measured for the control strain *C. glutamicum* (pEKEx2) with an empty vector (Fig.1b). Analysis of  
133 fluorescence levels obtained under fully induced conditions (> 500 μM) revealed that fluorescence  
134 signals of all three strains were significantly different to each other. In presence of the highest tested

135 IPTG concentration (5 mM IPTG), fluorescence intensities derived from the high-mCherry construct and  
136 the low-mCherry construct were approximately 50-fold and 5-fold higher when compared to the empty  
137 vector control, respectively (Fig. 1b). The results show that the constructed TFBS possess significantly  
138 different mCherry levels and both can clearly be distinguished from background fluorescence levels in  
139 liquid cultures using a microplate reader.

140

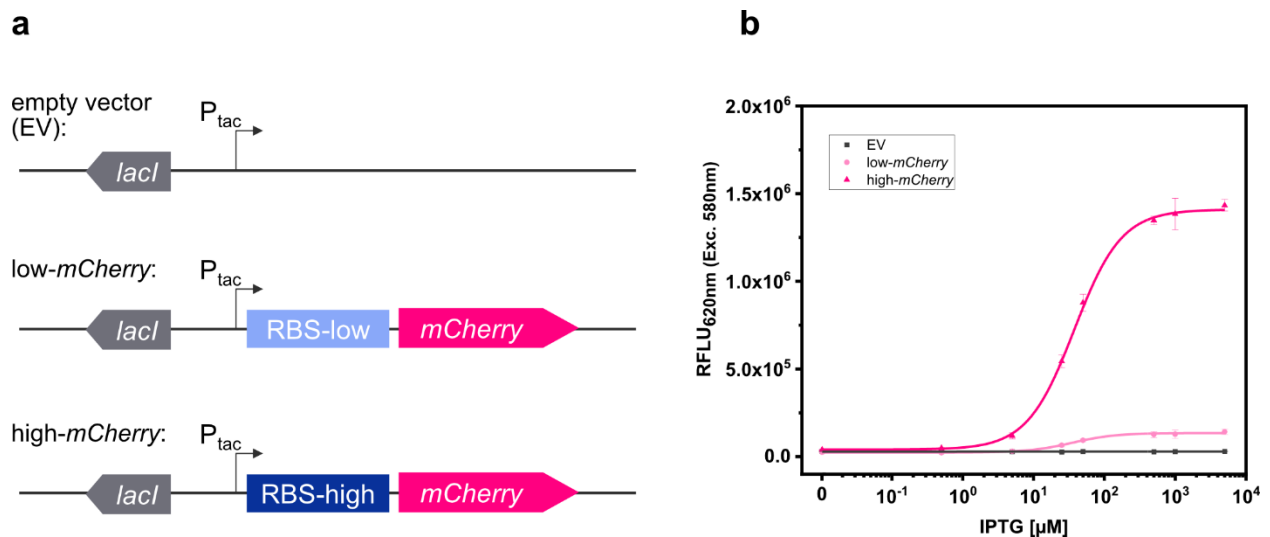

141

142 Figure 1: Schematic illustration of the genetic constructs for the expression platforms in pEKEx2 with different levels of mCherry  
143 translation initiation (a). Relative fluorescence units [RFLU] in presence of different IPTG concentrations after over-night  
144 cultivations in liquid media for *C. glutamicum* (pEKEx2) (EV: grey squares), *C. glutamicum* (pEKEx2\_low\_mCherry) (low-mCherry:  
145 light pink circles) and *C. glutamicum* (pEKEx2\_high\_mCherry) (high-mCherry: dark pink triangles) (b). A Hill function was fit to  
146 low-mCherry and high-mCherry data, and a linear fit was used for the empty vector (EV). Error bars represent standard  
147 deviation of four biological replicates.

148

149 To analyze the fluorescence signals derived from colonies of the three test strains *C. glutamicum*  
150 (pEKEx2), *C. glutamicum* (pEKEx2\_low\_mCherry), and *C. glutamicum* (pEKEx2\_high\_mCherry) via  
151 imaging, the strains were spotted on rectangular OmniTray (Singer Instruments, United Kingdom) agar  
152 plates supplemented with different IPTG concentrations (0 mM to 5mM). After 48 h of incubation, the  
153 mCherry fluorescence was analyzed in a fluorescence filter equipped FUSION FX (Vilber) imaging system.  
154 In presence of 5 mM IPTG, colonies carrying the reporter pEKEx2\_high\_mCherry revealed significantly

155 higher fluorescence intensities (mean value  $8.09 \times 10^2 \pm 49$  RFLU) when compared to colonies carrying  
156 the empty vector control ( $5.10 \times 10^2 \pm 43$  RFLU) (Figure 2a, b). In contrast, statistical analysis via ANOVA  
157 revealed that fluorescence signals derived from colonies of *C. glutamicum* (*pEKEx2\_low\_mCherry*) ( $4.92$   
158  $\times 10^2 \pm 24$  RFLU) are not significantly different when compared to the empty vector control (Figure 2b).  
159 To note, increased exposure times (increased from 800 ms to 1000 ms) resulted in higher fluorescence  
160 levels for both the empty vector strain, the low-mCherry as well as high-mCherry variant (Fig. S1). Albeit,  
161 fluorescence signals obtained from the high-mCherry variant reached saturation at exposure times  
162 above 800 ms, the signals detected for the low-mCherry variant were still indistinguishable from signals  
163 obtained from the empty vector control strains under fully induced conditions (Fig. S1). Significant  
164 differences in the visual detection of biosensor fluorescence are a prerequisite towards rational  
165 decision-making during screens and the selection of variants. Thus, imaging is unlikely to be suitable for  
166 all biosensors and libraries <sup>7</sup>.

167 The accurate positioning of 96-arrayed colonies on rectangular agar plates (in a 96-well scheme) was  
168 used to measure each colony with the optics of the plate reader. To confirm the accurate positioning of  
169 arrayed colonies, we performed an absorbance scan in a 96-well scheme with 30 x 30 scans per well for  
170 an OmniTray agar plate with 96- arrayed colonies in the plate reader (Fig. S2). The absorbance scan  
171 revealed that each colony, corresponding to the respective well, was centered irrespectively of the  
172 position of the individually measured colony (Fig. S2). The exact match of the positioning allowed the  
173 plate reader to perform single point measurements similar to measurements performed using 96-well  
174 plates. Accordingly, time required for analyses of the 96-colonies can be reduced from 90 minutes (scan  
175 mode) to 20 seconds (endpoint mode). Thus, the signals obtained from the colonies represent an  
176 average value from the colony rather than capturing heterogeneity across the colony.

177 Based on the precision and accuracy of the colony positions, the same agar plates used for fluorescence  
178 imaging were now analyzed using a standard microplate reader. Fluorescence analysis revealed that



179 signals detected via the plate reader for colonies equipped with the high-mCherry construct (average  
180 fluorescence of  $1.18 \times 10^{12} \pm 4.56 \times 10^{11}$  FLU), as well as for colonies with the low-mCherry construct  
181 ( $1.46 \times 10^6 \pm 4.76 \times 10^4$ FLU), were significantly different when compared to the empty vector control  
182 ( $3.23 \times 10^5 \pm 1.70 \times 10^4$ FLU) (Fig. 2c).

183 In addition, we tested the dose-dependent response of the TFB carrying strains  
184 *C. glutamicum* (pEKEx2\_low\_mCherry and *C. glutamicum* (pEKEx2\_high\_mCherry) on agar plates with a  
185 series of different IPTG concentrations (0 to 5 mM IPTG; Fig. 2d). Hereby, similar dose-response curves  
186 were obtained for all strains when compared to the liquid cultures (Fig. 1b). As expected, no IPTG  
187 dependent increase of mCherry fluorescence was detected for colonies of the empty vector control  
188 strain *C. glutamicum* (pEKEx2). These results demonstrate that a microplate reader can be used for  
189 assessing fluorescence signals in arrayed colonies.

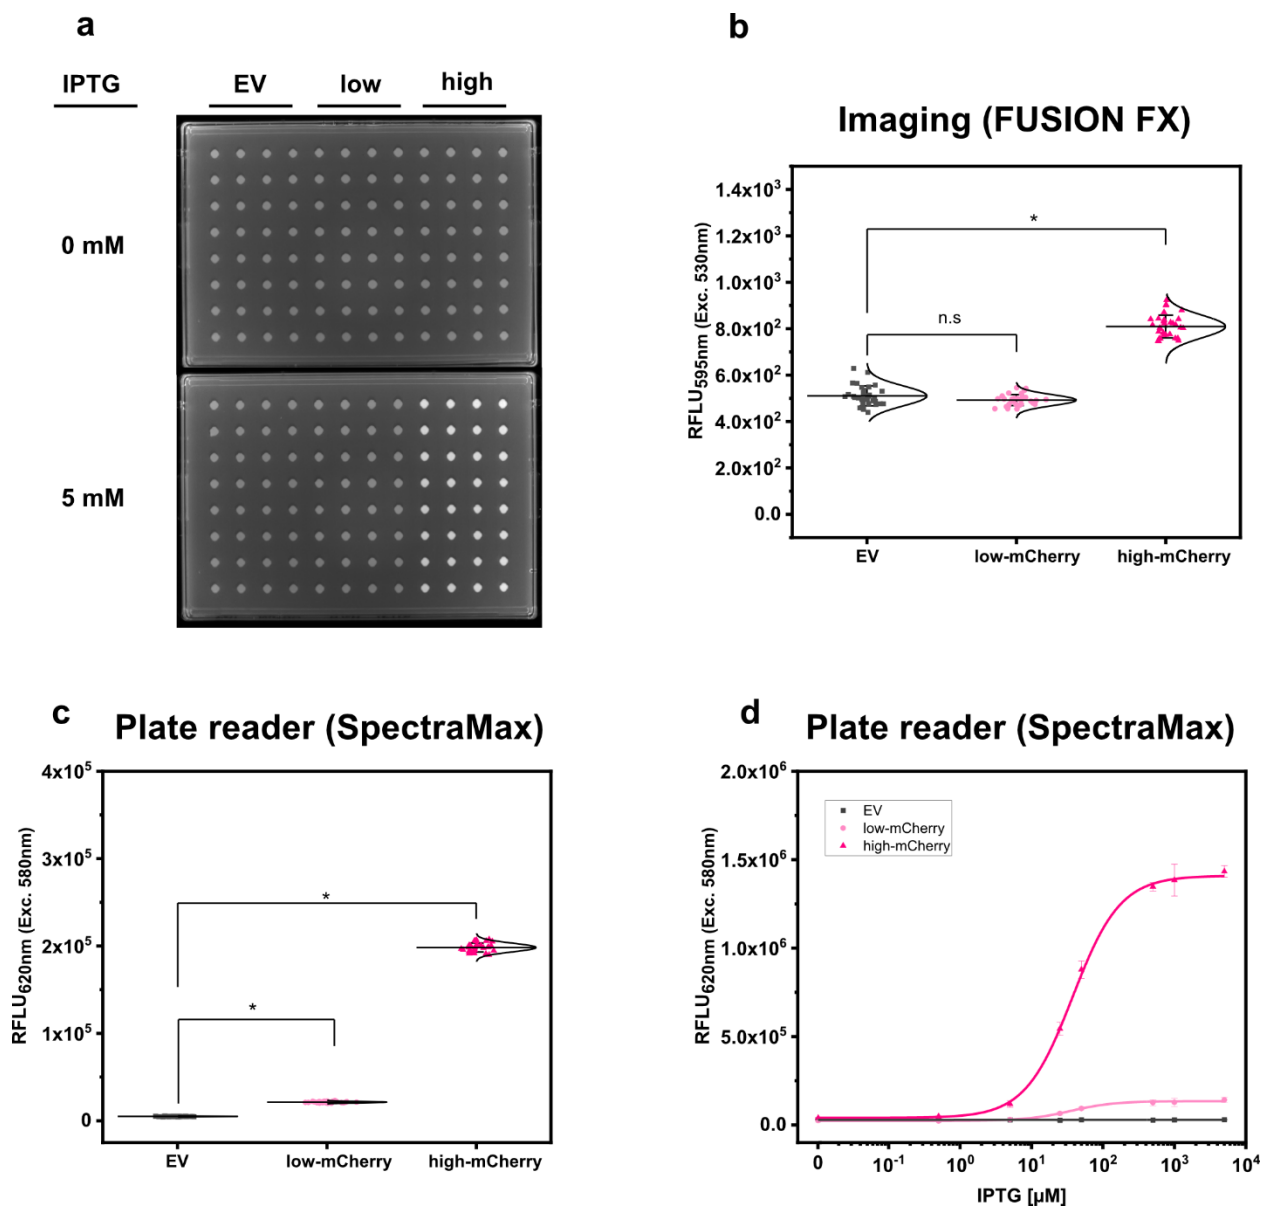

190

191 Figure 2: Comparison of fluorescence detection of arrayed bacterial colonies on agar plates via imaging and plate reader-based  
 192 analysis. Representative fluorescence image of 32 colonies of *C. glutamicum* WT (pEKEx2) (EV: grey squares),  
 193 *C. glutamicum* WT (pEKEx2\_low\_mCherry) (low: light pink circles) and *C. glutamicum* WT (pEKEx2\_high\_mCherry) (high: dark  
 194 pink triangles) are spotted in absence (0 mM) or presence (5 mM) of IPTG by the use of the imaging system FUSION FX (Vilber)  
 195 (a), the respective relative fluorescence units [RFLU] of determined for the different colonies (b) and the RFLU values of  
 196 *C. glutamicum* colonies recorded via a plate reader (SpectraMax iD3 multi-mode plate reader (Molecular Devices LLC, U.S.A))  
 197 (c). RFLU values determined for arrayed colonies of *C. glutamicum* (pEKEx2) (EV: grey squares), *C. glutamicum*  
 198 (pEKEx2\_low\_mCherry) (low-mCherry: light pink circles) and *C. glutamicum* (pEKEx2\_high\_mCherry) (high-mCherry: dark pink  
 199 triangles) cultivated in presence of different IPTG concentrations (d). For sigmoidal curve fitting, Hill's equation (low-mCherry  
 200 and high-mCherry). For the empty vector (EV), a linear fit was used. For fluorescence analysis using the plate reader  
 201 excitation and emission were set to 580 nm and 620 nm, respectively. Imaging of arrayed colonies on agar plates was conducted using the  
 202 imaging system FUSION FX (Vilber) equipped with a capsule for excitation (530 nm) and an emission filter (595 nm).  
 203 Fluorescence signals were statistically analyzed with one-way-ANOVA followed by Tukey's test (<sup>n.s</sup>  $p > 0.05$ ; \*  $p \leq 0.001$ ). Error  
 204 bars represent standard deviation of 32 colonies.

205

206 **2.2 Microplate reader-based system for improved fluorescence analysis of promoter-based biosensors**  
207 **in *Saccharomyces cerevisiae* colonies on agar plates**

208 We next addressed the applicability of the microplate reader-based method for the analysis of  
209 fluorescence signals from the broadly used fluorescent protein GFP in colonies of the well-known model-  
210 organism *S. cerevisiae*. For this purpose, two model strains of the haploid prototrophic yeast  
211 *S. cerevisiae* CEN.PK113-7D<sup>23</sup> were constructed by integration of expression cassettes with yeGFP as  
212 optical readout. Towards the development of reporter systems with different expression levels, a well-  
213 characterized weak constitutive promoter (PDA1) and strong glycolytic promoter (TDH3) were used to  
214 control varying levels of yeGFP production <sup>24</sup>. Prior to analyzing the fluorescence signals from  
215 *S. cerevisiae* (background control), *S. cerevisiae* (PDA1-yeGFP) (weak promoter), and *S. cerevisiae*  
216 (TDH3p-yeGFP) (strong promoter), strains were arrayed on OmniTray agar plates.

217 First, fluorescence analyses of GFP signals from arrayed *S. cerevisiae* colonies was performed using the  
218 microbial colony CCD imaging workstation Phenobooth (Singer Instruments), equipped with the  
219 manufacturer's filters for GFP fluorescence. As depicted in Fig. 3a, all colonies of *S. cerevisiae*  
220 (background) and *S. cerevisiae* (PDA1-yeGFP) (weak promoter) revealed fluorescence intensities at the  
221 same level. In contrast, significantly increased mean fluorescence intensities ( $1.28 \pm 0.14$  fold) were  
222 measured for colonies of *S. cerevisiae* (TDH3p-yeGFP) (strong promoter). However, individual signals  
223 from colonies equipped with the strong promoter still partly overlap with the values derived from the  
224 background control colonies. This means that during a random screen a high number of "GFP positive"  
225 strains would have remained undetected resulting in a low screening efficiency. Next, fluorescence  
226 signals were analyzed by the use of the imaging system FUSION FX (Vilber), equipped with a capsule and  
227 a filter for excitation at 435nm and emission at 480nm, respectively. The mean fluorescence signals  
228 derived from 96 colonies of *S. cerevisiae* (PDA1-yeGFP) (weak promoter) and *S. cerevisiae* (TDH3p-  
229 yeGFP) (strong promoter) were significantly increased by  $1.30 \pm 0.10$  fold and  $2.37 \pm 0.22$  fold when

230 compared to the background control, respectively (Fig. 3b). Even though not all individual colonies of  
231 *S. cerevisiae* (PDA1-yeGFP) can explicitly be distinguished from colonies of the control *S. cerevisiae*  
232 strain, which shows background levels of fluorescence, fluorescence analysis via the FUSION FX imaging  
233 system has significantly been improved when compared to the use of an imaging workstation  
234 (Phenobooth, Singer Instruments).

235 As a next step, the microplate reader-based method was used to analyze yeGFP signals derived from the  
236 different promoters in *S. cerevisiae*. As described for mCherry signals in *C. glutamicum* by the use of the  
237 microplate reader SpectraMax, an average value of  $6.62 \times 10^4 \pm 8.59 \times 10^3$  RFLU,  $1.19 \times 10^5 \pm 1.22 \times 10^4$   
238 RFLU and  $7.46 \times 10^5 \pm 8.74 \times 10^4$  RFLU was determined for *S. cerevisiae* (background), *S. cerevisiae*  
239 (PDA1-yeGFP) (weak promoter) and *S. cerevisiae* (TDH3p-yeGFP) (strong promoter), respectively (Fig.  
240 3c). This corresponds to a significant  $1.80 \pm 0.16$  fold (weak promoter) and  $11.30 \pm 1.02$  fold (strong  
241 promoter) increase when compared to the background control. In contrast to fluorescence imaging, all  
242 individual signals obtained for the 96 analyzed colonies harboring both the weak promoter (PDA1-  
243 yeGFP) or the strong promoter (TDH3p-yeGFP) possessed higher fluorescence levels when compared to  
244 background control colonies (Fig. 3c).

245 To demonstrate transferability of the microplate reader-based approach, we next analyzed fluorescence  
246 signals in arrayed colonies using a CLARIOstar<sup>plus</sup> as a different plate reader device. When compared to  
247 *S. cerevisiae*, the mean fluorescence intensity measured for all colonies equipped with the weak  
248 promoter (PDA1-yeGFP) and strong promoter (TDH3p-yeGFP) were increased  $1.93 \pm 0.13$  fold and  $12.36$   
249  $\pm 0.89$  fold, respectively (Fig. 3d). These results are in accordance with results obtained via the  
250 SpectraMax plate reader.

251 Taken together, microplate reader-based analysis of colony fluorescence enables the precise and  
252 sensitive detection of fluorescence levels of reporter proteins in various microorganisms. To facilitate

253 fluorescence analysis via this approach it is required that the colonies are arrayed in a microtiter-based  
254 format. If it is not possible to array the microbial colonies, fluorescence analysis via sensitive imaging  
255 systems equipped with adequate sets of filters, such as those used here for the FUSION FX (Vilber)  
256 imaging system, are a good alternative, although their incorporation in highly automated workflows is a  
257 challenge.

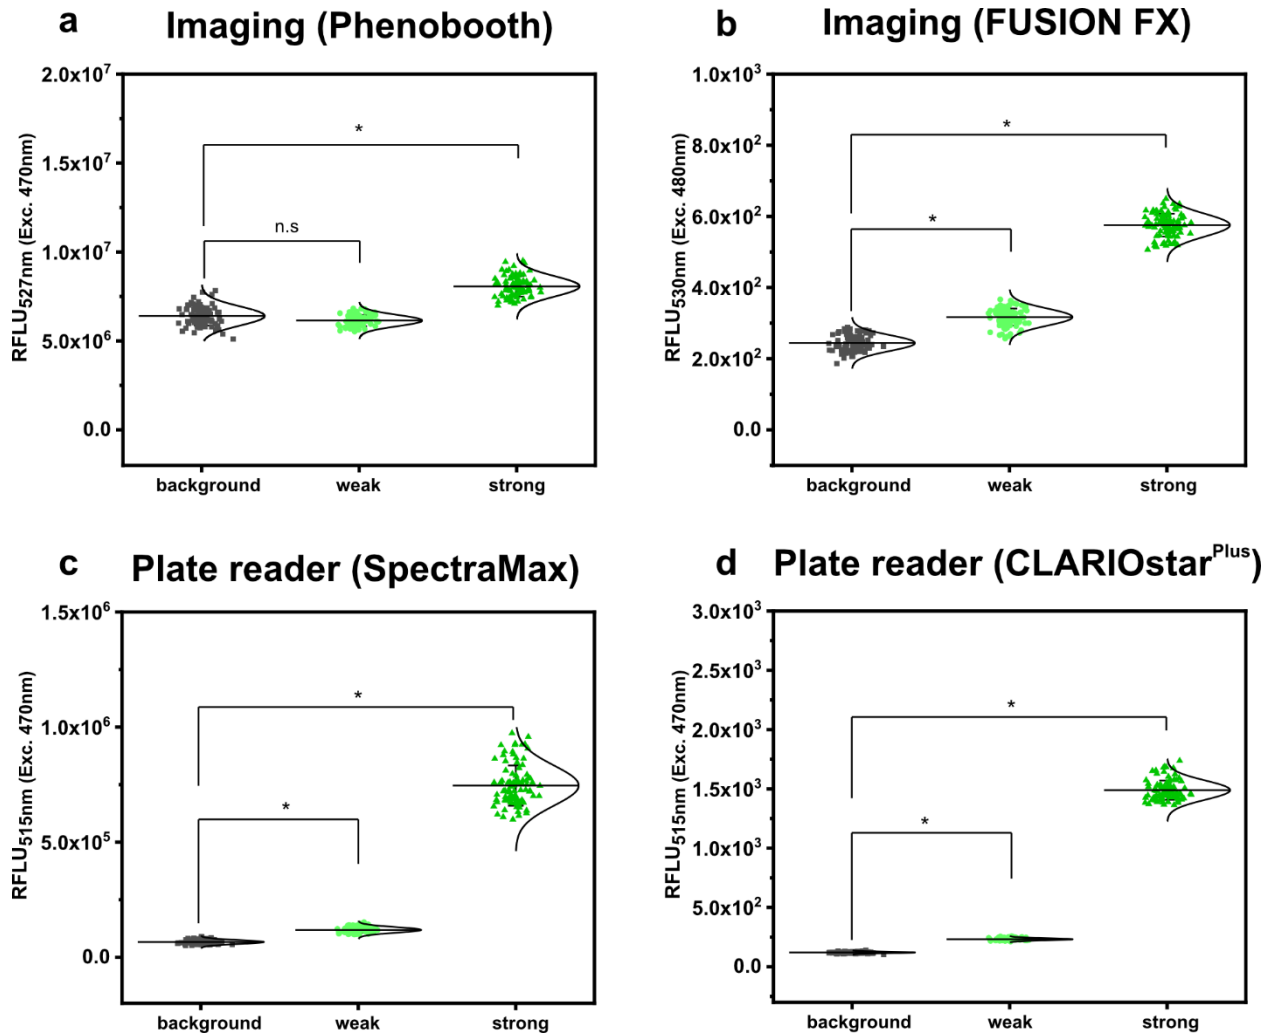

258

259 Figure 3: Comparison of fluorescence detection of arrayed *Saccharomyces cerevisiae* colonies on agar plates via imaging and  
260 plate reader-based analysis. Relative fluorescence units (RFLU) of 96-arrayed colonies of *Saccharomyces cerevisiae*  
261 (background; grey squares), *Saccharomyces cerevisiae* (TDH3p-yeGFP) (weak; light green circles) and *Saccharomyces cerevisiae*  
262 (PDA1p-yeGFP) (strong, green triangles) analyzed via imaging using the Phenobooth (a) or the FUSION FX (Vilber) (b). Further,  
263 fluorescence analysis was performed using the plate reader devices SpectraMax (c) and CLARIOstar<sup>Plus</sup> (d). RFLU were obtained  
264 by normalizing the fluorescence intensity to the colony size (perimeter). Fluorescence signals were statistically analyzed with  
265 one-way-ANOVA followed by Tukey's test (<sup>n.s.</sup>  $p > 0.05$ ; \*  $p \leq 0.001$ ). Mean values from 96- replicates are shown (solid horizontal  
266 line).

267 **2.3 Microplate reader-based analysis of the pH-sensitive protein mCherryEA improves accuracy of**  
268 **internal pH measurements in *E. coli* colonies**

269 The use of a monochromator equipped microplate reader allowed us to set optimal excitation and  
270 emission wavelength settings for the sensitive detection of mCherry and GFP signals from microbial  
271 colonies. To test if the versatility and precision of the wavelength settings via the monochromators also  
272 enables sensitive analyses of fluorescence signals from ratiometric fluorescent reporter proteins, we  
273 aimed to compare analysis of fluorescence signals from the internal pH-sensor protein mCherryEA in  
274 arrayed *E. coli* colonies via a plate reader to the recently described approach via fluorescence imaging in  
275 a FUSION FX (Vilber) imaging system<sup>8</sup>.

276 For this purpose, colonies of the strain *E. coli* MG1655 (pXMJ19\_ *mCherryEA*) and the empty vector  
277 control strain *E. coli* MG1655 (pXMJ19) were arrayed on SB agar plates (pH 7.0). After cultivation, 5  $\mu$ L of  
278 PBS buffer supplemented with 0.05 % CTAB and with set pH values between 7.0 and 8.5 were applied  
279 onto the colonies, as recently described<sup>8</sup>. At this CTAB concentration the *E. coli* cell membrane is  
280 permeabilized allowing the internal pH to become adjusted to the set external pH<sup>17</sup>. The fluorescence of  
281 the colonies was analyzed using an excitation scan (400 nm – 590 nm) at an emission wavelength of  
282 630 nm and using the positions of the 96-well measurement mode of the plate reader. As depicted in  
283 Fig. 4a, two excitation maxima at 454 nm and 580 nm were obtained for colonies of *E. coli* MG1655  
284 (pXMJ19\_ *mCherryEA*), which are in accordance to the maxima observed in recently performed  
285 excitation scans of bacterial strains harboring the pH- sensitive mCherryEA protein in liquid culture<sup>8,25</sup>.  
286 As expected, no characteristic mCherryEA sensor signal was measured for the empty vector control  
287 *E. coli* MG1655 (pXMJ19) (Fig. 4a). When applying PBS buffer (+ CTAB) with a set pH of 7.0 to the  
288 colonies, an emission intensity of 5.8E + 06 FLU was measured at 454 nm excitation, whereas the signal  
289 obtained upon an excitation at 580 nm was higher with 6.8E + 06 FLU (Fig. 4a); when a PBS buffer (+  
290 CTAB) with a higher pH (8.5) was applied to a colony, the fluorescence intensity obtained for an

291 excitation at 454 nm increased ( $8.3E + 06$  FLU) and decreased at an excitation at 580 nm ( $4.4E + 06$  FLU).  
292 This pH-dependent response of the signals for mCherryEA at the two excitation wavelengths indicates  
293 that the ratiometric response of the biosensor protein mCherryEA in *E. coli* colonies on agar plates can  
294 be measured using the microplate reader-based system. Further, fluorescence from *E. coli* MG1655  
295 (pXMJ19\_mCherryEA) colonies treated with PBS buffer (+ CTAB) with set pH values ranging from 7.0 to  
296 8.5 (Fig. 4b) were analyzed using the plate reader (Exc. 454 nm/ 580 nm) and the recently established  
297 imaging method (Exc. 440 nm/ Exc. 530 nm)<sup>8</sup>. The biosensor ratios determined for the imaging method  
298 increased linear from  $0.62 \pm 0.02$  (pH 7.0) to  $1.08 \pm 0.03$  (pH 8.5) upon increasing the pH (Fig. 4b). A  
299 similar biosensor response was detected with the microplate reader-based method, resulting in an  
300 increase from  $0.85 \pm 0.03$  (pH 7.0) to  $1.35 \pm 0.03$  (pH 8.5) (Fig. 4b).

301 Next, 120 colonies arrayed on a rectangular agar plate were analyzed *via* the two different methods  
302 (imaging and plate reader) and the internal pH for each colony determined and visualized with a heat  
303 map, where each square corresponds to a single colony (Fig. 4c). For both methods, the mean internal  
304 pH obtained by the imaging method and the plate reader method was similar with  $7.66 \pm 0.13$  and  $7.65$   
305  $\pm 0.03$ , respectively (Fig. 4d). This agrees with the reported cytoplasmic pH of *E. coli* which is normally  
306 maintained within the range of 7.4-7.9<sup>26-28</sup> and recently determined internal pH levels in *E. coli* MG1655  
307 colonies on agar plates under similar conditions<sup>8</sup>. However, differences with respect to the distribution  
308 of the determined internal pH values were observed when comparing the data obtained for the two  
309 different methods (Fig. 4d). The plate reader method established here allowed us to narrow down the  
310 distribution from 7.26-7.82 ( $\Delta$ pH= 0.56; imaging method) to 7.59-7.76 ( $\Delta$ pH= 0.17; plate reader  
311 method), corresponding to a reduction of 0.39 pH units. As the pH is logarithmically and inversely  
312 related to the concentrations of hydrogen ions in a solution, the accuracy of the analysis is improved by  
313 390 %. The broader distribution obtained by the imaging method might be caused by reflection artefacts  
314 from the transparent edges of the OmniTray plates. To note, the imaging method relies on a one-step

315 excitation of the whole plate, whereas measurements performed in the microplate reader allowed us to  
316 measure colonies individually, similar to measurements performed in a 96-well microplate. Moreover,  
317 the microplate reader-based method allows operators to set excitation and emission wavelengths on  
318 demand and thus perfectly matches the two excitation maxima displayed by the sensor protein  
319 mCherryEA. In contrast, the imaging system FUSION FX (Vilber) needs to be equipped with the most  
320 suited capsules and filters available (Exc. 440 nm & Exc. 530 nm), which often do not match the  
321 properties of the fluorescent protein<sup>25,29,30</sup>.

322



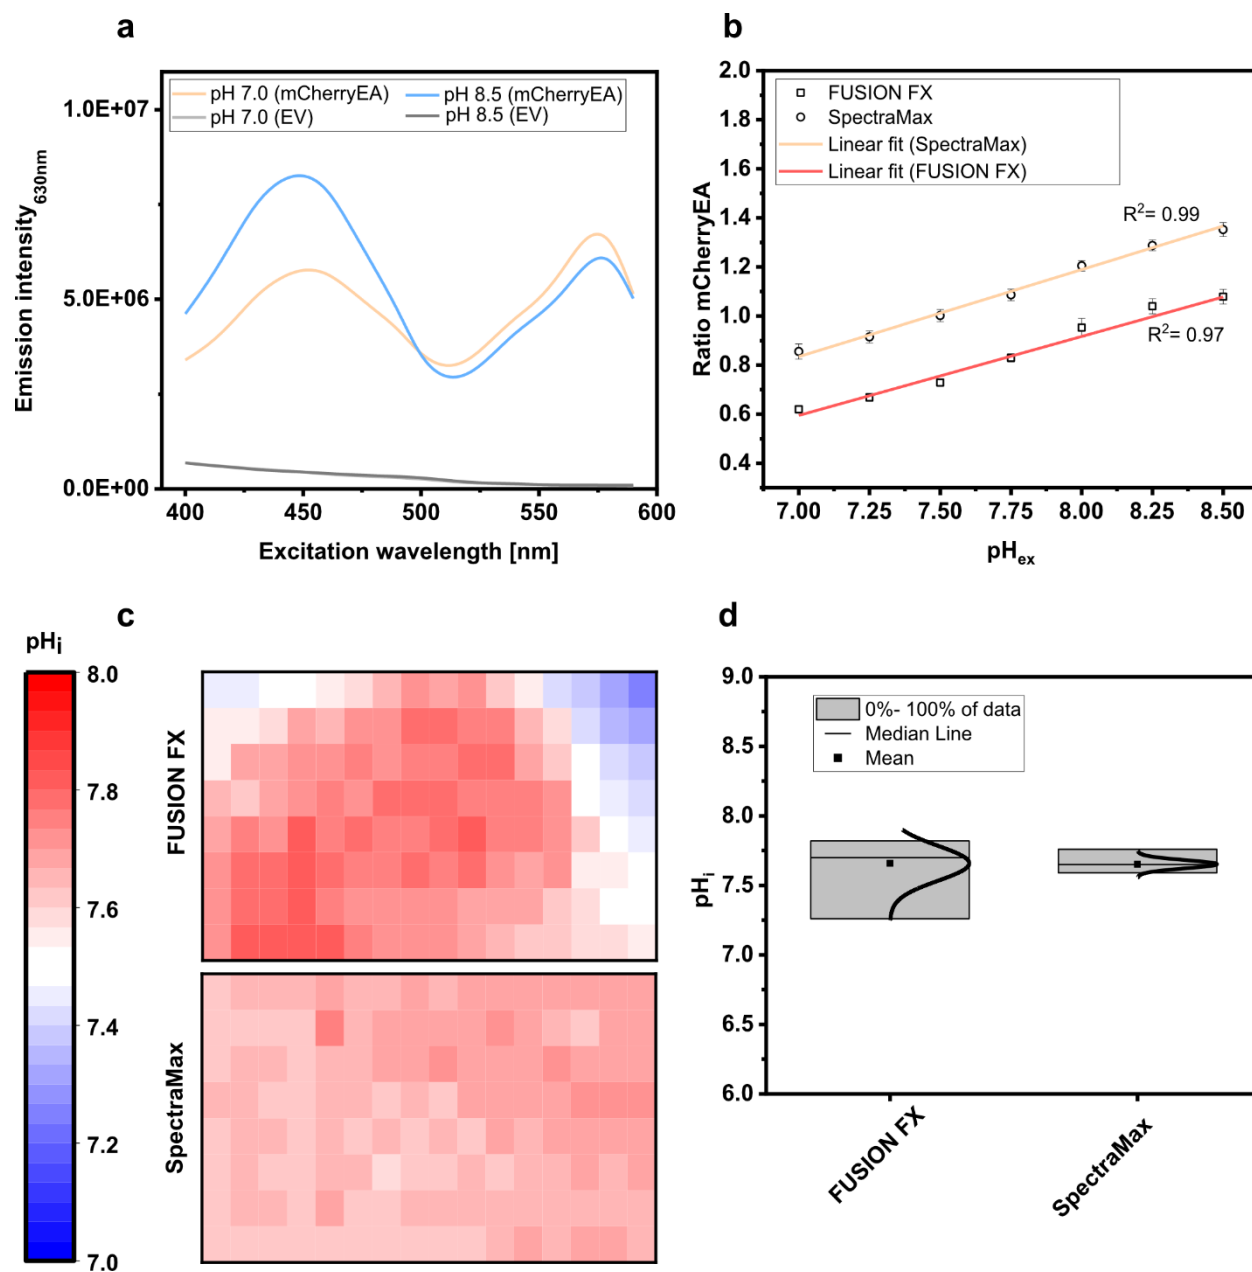

323

324 Figure 4: Excitation scan (400 nm – 590 nm) recording the emission intensity at 630 nm in colonies of *E. coli* MG1655  
 325 (pXMJ19\_mCherryEA) (mCherryEA) and the empty vector control strain *E. coli* MG1655 (pXMJ19) (EV) after applying 5  $\mu\text{L}$  PBS  
 326 buffer supplemented with cetyltrimethylammonium bromide (CTAB; final concentration 0.05 % (w/v)) with a set pH of 7.0 and  
 327 8.5 (a) and ratiometric biosensor signals obtained by dividing the emission intensity at 454 nm by 580 nm upon applying PBS  
 328 buffer with pH values ranging from 7.0 – 8.5 (b). Calculation of the internal pH for biosensor signals recorded from 120 colonies  
 329 either *via* imaging using the FUSION FX imaging system equipped with two capsules (Exc. 440 nm & Exc. 530 nm) and one  
 330 emission filter (Em. 595 nm) as recently described in Hartmann et al. 2022<sup>8</sup> or with a microplate reader system (SpectraMax) (c)  
 331 and data distribution with median and mean values obtained by the two different approaches (d). Error bars represent  
 332 standard deviation from at least three replicates.

333

334

335 **2.4 Mycothiol is required to maintain a reduced environment in *C. glutamicum* colonies growing on**  
336 **agar plates**

337 The improved accuracy using the plate reader-based biosensor analysis represents a significant step  
338 forward with respect to screening approaches requiring high sensitivities. Moreover, the high flexibility  
339 brought by the monochromatic technology of the plate reader device easily adapts to other fluorescent  
340 reporter proteins without causing additional costs and effort to equip imaging devices with appropriate  
341 filters. Thus, we next tested this novel technique by applying a ratiometric redox biosensor protein  
342 called Mrx1-roGFP2 in *C. glutamicum* colonies.

343 The abundant low molecular weight (LMW) mycothiol (MSH) functions to maintain the reduced state of  
344 the cytoplasm and represents the main non-enzymatic antioxidant in high-GC Gram-positive bacteria,  
345 such as the industrial amino acid producer *C. glutamicum*<sup>31–33</sup>. Recently, the genetically encoded redox  
346 biosensor protein Mrx1-roGFP2 was successfully applied in *C. glutamicum* WT and the MSH-deficient  
347 mutant strain *C. glutamicum*  $\Delta mshC$  to monitor dynamic redox changes in liquid cultures<sup>16,34</sup>. Mutant  
348 strains lacking MSH have revealed high susceptibility towards oxidative stress resulting in an impaired  
349 growth behavior when cells were exposed to artificial oxidants in shaker-flasks<sup>32</sup>. In absence of artificial  
350 oxidants, growth of the MSH-deficient mutant strain proceeded similar to the wild type strain<sup>16,32,34</sup>,  
351 even though biosensor measurements in the mutant strain revealed an oxidative redox shift<sup>16,34</sup>.  
352 Detecting intracellular changes (i.e. oxidative stress) prior to the occurrence of a growth defect is an  
353 important advance for the development of highly sensitive sensor-based screening approaches. This  
354 prompted us to test the analysis of intracellular redox states in arrayed colonies of *C. glutamicum* WT  
355 and a mutant strain lacking MSH using the redox biosensor protein Mrx1-roGFP2.

356 To analyze the redox states in *C. glutamicum* colonies, the 380 nm/470 nm biosensor ratios from 120  
357 arrayed colonies of WT\_Mrx1-roGFP2 and the MSH-deficient mutant strain  $\Delta mshC$ \_Mrx1-roGFP2 were

358 determined. The Mrx1-roGFP2 biosensor consists of redox sensitive GFP2 (roGFP2) which harbors two  
359 Cys residues. Upon oxidation it forms a disulfide bond, resulting in an increase of the respective  
360 biosensor ratio (Exc. 380 nm/ Exc. 470 nm), whereas it responds in the opposite way upon reduction of  
361 the biosensor protein. As depicted in Fig. 5a, the mean values of the biosensor ratios were significantly  
362 different with  $0.82 \pm 0.01$  and  $1.52 \pm 0.02$  for WT\_Mrx1-roGFP2 and  $\Delta mshC$ \_Mrx1-roGFP2, respectively,  
363 indicating a more oxidized state of the biosensor protein Mrx1-roGFP2 in the  $\Delta mshC$ \_Mrx1-roGFP2  
364 strain background on agar plates (Fig. 5a). This is in accordance to previous measurements conducted in  
365 liquid cultures with biosensor ratios of  $1.0 \pm 0.02$  (WT\_Mrx1-roGFP2) and  $1.52 \pm 0.03$  ( $\Delta mshC$ \_Mrx1-  
366 roGFP2)<sup>16</sup>.

367 Further, we validated the dynamic response and functionality of the sensor protein Mrx1-roGFP2 in  
368 colonies by applying Dithiothreitol (DTT; 100 mM) and Natriumhypochlorite (NaOCl; 100 mM) as  
369 reducing and oxidizing agents, respectively. For this, 5  $\mu$ L drops were applied onto WT\_Mrx1-roGFP2  
370 and  $\Delta mshC$ \_Mrx1-roGFP2 colonies followed by real-time monitoring of the biosensor signals. Prior to  
371 the colony treatment, WT\_Mrx1-roGFP2 was maintaining stable biosensor ratios between 0.76 - 0.78  
372 followed by a strong reduction or increase of the biosensor ratio upon applying DTT or NaOCl,  
373 respectively (Fig. 5b). After five minutes of incubation, fully reduced (DTT; biosensor ratio of 0.53) and  
374 fully oxidized (NaOCl; biosensor ratio of 1.4) biosensor ratios were recorded until the end of the  
375 experiment (Fig. 5b). The treatment with PBS only temporarily induced a slight decrease of the recorded  
376 biosensor ratio but then was restored to initially recorded biosensor ratios (Fig. 5b). In contrast,  
377  $\Delta mshC$ \_Mrx1-roGFP2 colonies revealed biosensor ratios between 1.4 - 1.45 prior to the treatment of the  
378 colonies. The addition of DTT buffer solution resulted in a strong reduction of the biosensor ratio  
379 reaching fully reduced ratios of 0.54, six to eight minutes following the treatment (Fig. 5c). As expected,  
380 treatment with NaOCl just slightly increased the ratio to 1.54 due to its almost fully oxidized state, when  
381 compared to a final biosensor ratio of 1.4 for colonies treated with PBS buffer only (Fig. 5c). To note, no

382 alteration of the recorded fluorescence signals was observed when performing the same experiment  
383 using the *C. glutamicum* WT controls strain, indicating that the measured change of the ratiometric  
384 biosensor signals in both sensor strains can be attributed to the biosensor protein Mrx1-roGFP2 (Fig.  
385 S3).

386 Based on the measured biosensor ratios, the oxidation degree (OxD) of the biosensor protein Mrx1-  
387 roGFP2 was calculated according to equation 1. OxD values of  $0.93 \pm 0.03$  and  $0.33 \pm 0.03$  were  
388 calculated for the Mrx1-roGFP2 biosensor in  $\Delta mshC$ \_Mrx1-roGFP2 and WT\_Mrx1-roGFP2 colonies on  
389 agar plates, respectively (Fig. 5d). The results are consistent with previous studies performed in shaker-  
390 flasks under non-stressed conditions where OxD values between 0.3 - 0.5 were reported for WT\_Mrx1-  
391 roGFP2<sup>16,34</sup>. In contrast, almost fully oxidized biosensor states were reported for the MSH-deficient  
392 mutant strain (OxD = 0.8 - 0.95)<sup>16,34</sup>. Upon the formation of ROS, the redox-active sulfhydryl group of  
393 MSH can either scavenge free radicals directly or functions as a cofactor for antioxidant enzymes  
394 resulting in formation of oxidized mycothiol disulfide (MSSM)<sup>31,35-38</sup>. Accordingly, the lack of MSH  
395 elevates the intracellular ROS levels and in turn induces an auto-oxidation of the biosensor protein  
396 Mrx1-roGFP2 in  $\Delta mshC$ \_Mrx1-roGFP2. Thus, previous results and the results of this study indicate the  
397 major role of MSH for the overall redox homeostasis under aerobic growth conditions in shake-flasks  
398 cultivations but also in colonies growing on agar plates.

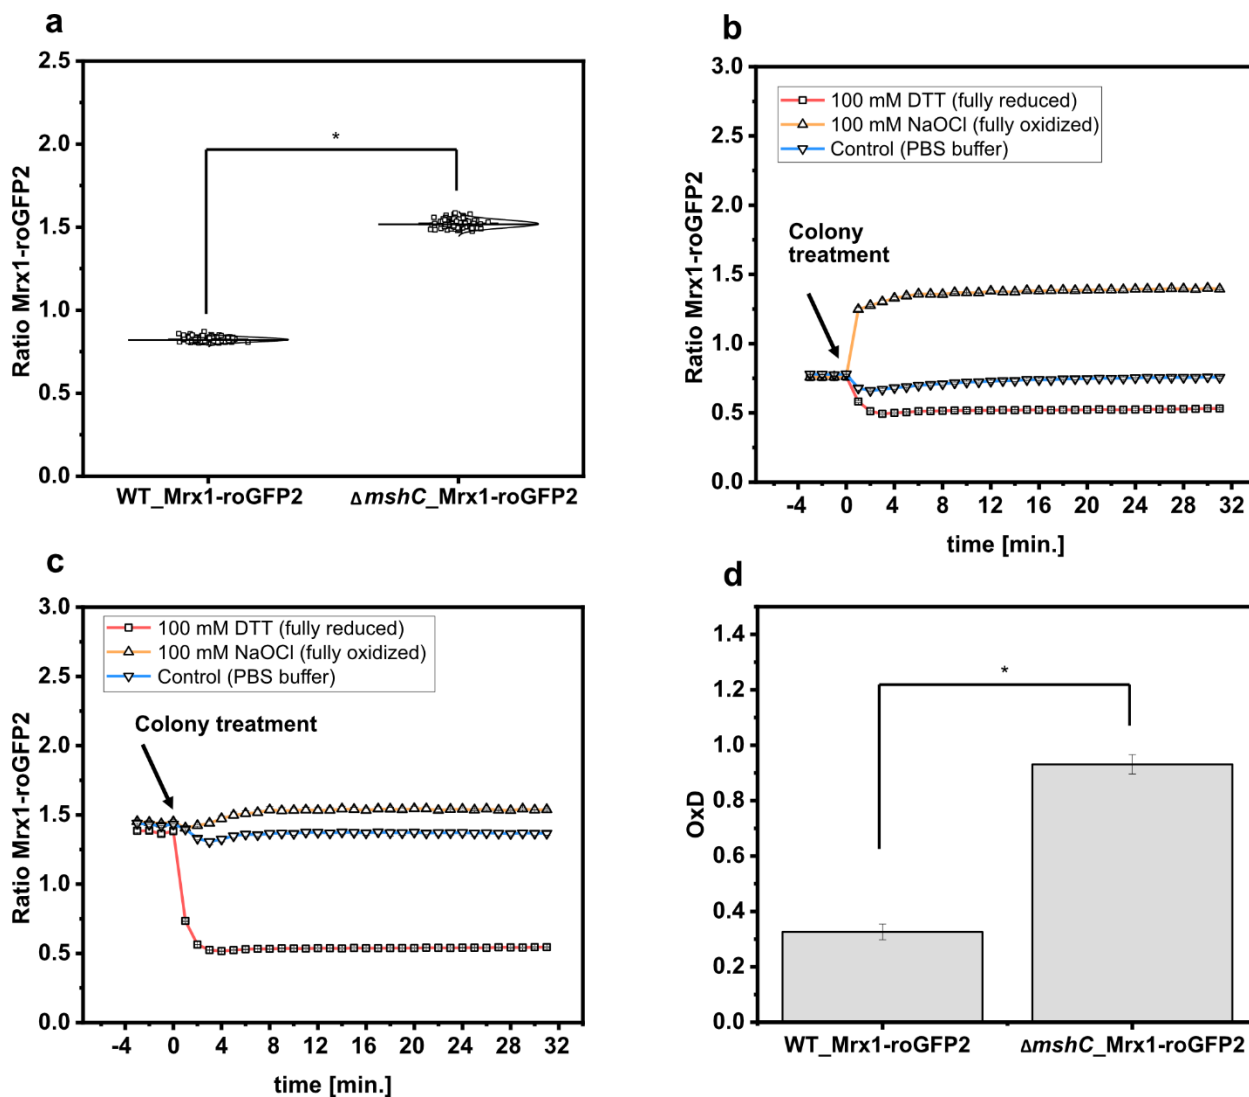

399

400 Figure 5: Calculated biosensor ratio (Exc. 380nm/ Exc. 470 nm) of the sensor protein Mrx1-roGFP2 in colonies of  
 401 *C. glutamicum* WT\_Mrx1-roGFP2 (WT\_Mrx1-roGFP2) and *C. glutamicum*  $\Delta mshC$ \_Mrx1-roGFP2 ( $\Delta mshC$ \_Mrx1-roGFP2) (a) and  
 402 real-time monitoring of the response of the ratiometric signal of the biosensor Mrx1-roGFP2 upon applying DTT (100 mM)  
 403 (reducing agent), hypochlorite (100 mM) (oxidizing agent) and PBS buffer (control) onto WT\_Mrx1-roGFP2 (b) and  
 404  $\Delta mshC$ \_Mrx1-roGFP2 colonies (c). Calculation of the oxidation degree (OxD) by normalizing biosensor ratios to fully oxidized  
 405 and reduced states (d). For sensor analysis, 30 colonies from four independent agar plates and experiments were analyzed for  
 406 each strain (120 colonies in total). Biosensor ratios were analyzed with one-way-ANOVA followed by Tukey's test (<sup>n.s</sup>  $p > 0.05$ ; \*  
 407  $p \leq 0.001$ ).

408

409

410

411

## 412 **2.5 Ratiometric biosensor signals are independent of the colony size**

413 Fluorescence signals derived from single fluorescent proteins need to be normalized to the OD<sub>600</sub> (96-  
414 well screen) or colony size (agar screen). In contrast to single fluorescent proteins, a ratiometric  
415 fluorescent protein can be normalized to the second fluorescence signal rather than growth related  
416 parameters. This implies that a ratiometric biosensor signal should not be affected by changes of the  
417 colony size during screens on agar plates.

418 To test this, a dilution series (different set OD<sub>600</sub>) of *C. glutamicum* WT (WT), *C. glutamicum* WT\_Mrx1-  
419 roGFP2 (WT\_Mrx1-roGFP2) and *C. glutamicum*  $\Delta$ mshC\_Mrx1-roGFP2 ( $\Delta$ mshC\_Mrx1-roGFP2) was  
420 spotted on rectangular OmniTray plates with solidified CGXII minimal medium (1 % Glucose) (Fig. 6a).  
421 After 48 hours of incubation, the final colony size was determined for all spotted dilutions and the size  
422 reduction calculated relative to the highest applied OD<sub>600</sub> (Fig. 6a). For the highest applied OD<sub>600</sub> (10<sup>1</sup>),  
423 defined as 100 % colony size, the area was determined to be 680 ± 29, 610 ± 52 and 590 ± 49 pixels for  
424 the WT, WT\_Mrx1-roGFP2 and the  $\Delta$ mshC\_Mrx1-roGFP2 colonies, respectively (Fig. 6a). Upon applying  
425 higher dilutions (stepwise 1:10), the relative colony size was reduced by approximately 10 % for each  
426 dilution step and a relative colony size of 55 ± 8 %, 61 ± 2% and 54 ± 0.4 % was reached upon applying  
427 an OD<sub>600</sub> of 10<sup>-3</sup> for the WT, WT\_Mrx1-roGFP2 and  $\Delta$ mshC\_Mrx1-roGFP2 strain, respectively (Fig. 6a). For  
428 this dilution, the circular morphology of the colonies was impaired leading to inaccuracies with respect  
429 to the colony size determination for further dilutions (Fig. 6a). Next, the positions of the arrayed  
430 colonies from the dilution series were selected and the fluorescence intensity derived from the sensor  
431 protein Mrx1-roGFP2 analyzed. Absolute fluorescence intensities measured at 510 nm (Exc. 470 nm)  
432 revealed increased fluorescence levels in colonies of WT\_Mrx1-roGFP2 (5.4 x 10<sup>6</sup> – 1.3 x 10<sup>7</sup> FLU) and  
433  $\Delta$ mshC\_Mrx1-roGFP2 (4.2 x 10<sup>6</sup> – 1.03 x 10<sup>7</sup> FLU) strains when compared to the parental wild type strain  
434 *C. glutamicum* (1.90 – 3.90 x 10<sup>6</sup> FLU) (Fig. 6b). Absolute fluorescence intensities decreased upon a  
435 reduction of the colony size (Fig. 6b). In accordance with the fluorescence analysis for mCherry or GFP in

436 the previous sections, relative fluorescence intensities were calculated by normalizing the absolute  
437 fluorescence intensity to the perimeter of the colony. As expected, fluorescence signals normalized to  
438 the measured perimeter of the colonies resulted in stable relative fluorescence intensities until a colony  
439 size reduction of 70 % was reached (Fig. S4). Next, the second fluorescence signal (Exc.  
440 380 nm/Em. 510 nm) was measured for all colonies and the biosensor ratio calculated (Exc. 380 nm/ Exc.  
441 470 nm). The ratiometric biosensor signal independently of the colony size, remained stable between  
442 1.0 – 1.1 and 1.4 – 1.5 in WT\_Mrx1-roGFP2 and  $\Delta mshC$ \_Mrx1-roGFP2 colonies, respectively (Fig. 6c). As  
443 discussed in the previous section, higher biosensor ratios measured for the MSH-deficient strain are  
444 caused by the more oxidized state of the biosensor protein Mrx1-roGFP in this strain background. To  
445 note, increased ratiometric signals (between 2.5 to 4.0) for the agar surface (no colony) and for  
446 *C. glutamicum* not harboring the biosensor protein Mrx1-roGFP2 are due to low background  
447 fluorescence at 510 nm (Exc. 470 nm) but a higher background fluorescence at 510 nm when excited at  
448 380 nm (Fig. 6c).

449 Taken together, the results demonstrate that the signal derived from a ratiometric biosensor is robust  
450 against variations of colony size and the morphology of colonies (Fig. 6c). This makes ratiometric FRPs a  
451 powerful tool when conducting screens of mutant libraries comprising different phenotypes (e.g. growth  
452 behavior). Furthermore, agar plate-based screens provide the advantage that the tested strains can be  
453 exposed to various conditions at the same time (replica plating) <sup>19,39</sup>. Conducting screens under  
454 industrially relevant conditions (e.g. pH gradients) supported by the use of ratiometric “stress”  
455 biosensors will facilitate the development of structured metabolic models for industrially relevant  
456 organisms. This bridges metabolic engineering and bioprocess development allowing for the  
457 development of computational models suitable for both cell factory design and process optimization at  
458 industrial scales in the future <sup>40</sup>.

**a**

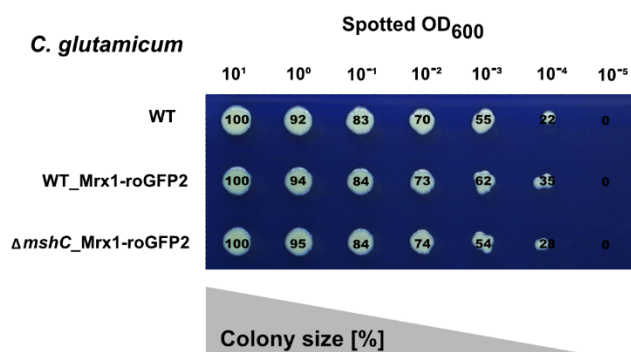

**b**

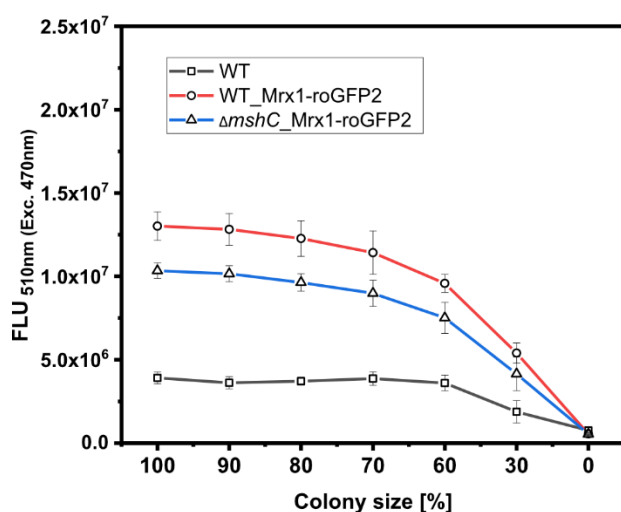

**c**

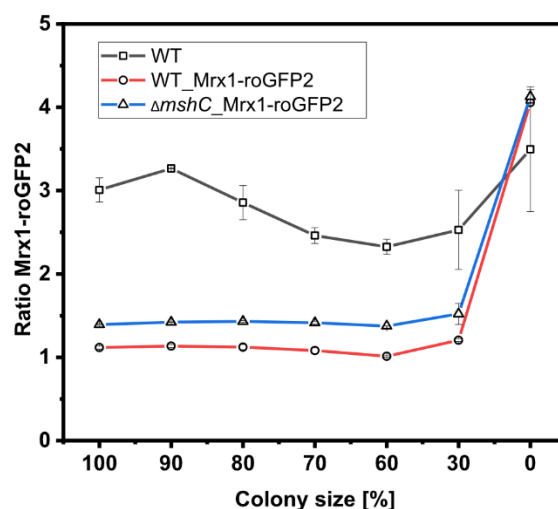

459

460 Figure 6: Robotic spotting of a dilution series of *C. glutamicum* WT (WT), *C. glutamicum* WT\_Mrx1-roGFP2 (WT\_Mrx1-roGFP2)  
 461 and *C. glutamicum*  $\Delta mshC$ \_Mrx1-roGFP2 ( $\Delta mshC$ \_Mrx1-roGFP2) liquid cultures with different set optical densities measured at  
 462 600 nm (OD<sub>600</sub>) and determination of the colony size relative to the highest spotted OD<sub>600</sub> (a). Absolute fluorescence intensities  
 463 measured at 510 nm (Exc. 470 nm) to validate the presence of Mrx1-roGFP2 in WT\_Mrx1-roGFP2 and  $\Delta mshC$ \_Mrx1-roGFP2  
 464 colonies (b), and the ratiometric biosensor signal of Mrx1-roGFP2 in the different colonies (c). Robotic spotting was performed  
 465 using a replica plating Robot ROTOR. Dilution series was grown on OmniTray plates with CGXII media supplemented with 1%  
 466 Glucose. Fluorescence analysis of the colonies from the dilution series was performed in a microplate reader (SpectraMax iD3).  
 467 For the calculation of the ratiometric biosensor signal, the emission intensity at 510 nm was recorded upon an excitation at  
 468 380 nm and 470 nm and the former was divided by the latter (Exc. 380 nm/ Exc. 470 nm). Mean values from two independent  
 469 experiments are shown.

470

471

472

473



### 474 **3 Conclusion**

475 Phenotypic screenings using arrayed colonies is a widely applied approach to screen strain libraries for  
476 particular variants with desired phenotypes. Genetically encoded biosensors are powerful analytical  
477 tools to support the rational decision making for strain selection as intracellular states can easily be  
478 assessed in a high-throughput manner. However, imaging analysis often limits the applicability of  
479 biosensors as the optical set-up of the utilized imaging device does not match with the properties of the  
480 fluorescent protein. The microplate reader-based system for sensor analysis established here provides  
481 the advantage of a monochromatic technology, which provides high flexibility with respect to different  
482 excitation and emission wavelengths. This novel technique has revealed high sensitivity for the  
483 detection of low fluorescence levels making it attractive for the development and optimization of  
484 genetic circuits regulating harmful targets. In addition, the monochromatic technology enables great  
485 opportunities to utilize FRPs, which application to date is often limited due to their complex ratiometric  
486 fluorescent properties. The ratiometric readout makes these types of biosensors highly robust against  
487 signal fluctuations caused by the colony size or morphology of the colony. Moreover, applications of  
488 such biosensors enables the measurement of complex intracellular states such as oxidative stress or the  
489 internal pH in real- time due to their fast dynamics. The microplate reader-based analysis established  
490 here can easily be adapted to further biosensors and combinations thereof without causing additional  
491 costs and effort to install adequate filter modules. Thus, this technique is expected to provide new  
492 possibilities for comprehensive phenotypic screenings and novel applications in metabolic engineering  
493 and systems biology.

494

495

## 496 4 Materials and methods

### 497 Strains, media, and culture conditions

498 Bacterial strains, yeast strains, and plasmids used in this study are listed in Table 1. Cloning was carried  
 499 out using *E. coli* DH5  $\alpha$ , cultivated in Lysogeny Broth (LB) medium<sup>41</sup>. *C. glutamicum* was cultivated using  
 500 BHI- media (Sigma Aldrich, Germany). *E. coli* MG1655 was cultivated in SB- medium (5 g/L yeast extract;  
 501 10 g/L BactoTryptone; 100 mM NaCl; 50 mM KCl, buffered with 50 mM TRIS; pH 7.0) as recently  
 502 described<sup>8</sup>. For preparation of agar plates, 16 g/L agar was added to the respective media. Strains  
 503 carrying plasmids were cultivated in presence of kanamycin (50  $\mu$ g/mL) or chloramphenicol (20  $\mu$ g/mL).  
 504 If required and unless stated otherwise, 1 mM IPTG was added to induce gene expression.

505 *Table 1: Bacterial strains, yeast strains and plasmids used in this study.*

| Bacterial Strains/ Plasmids                         | Description                                                                                                                                                | Reference/ Resource |
|-----------------------------------------------------|------------------------------------------------------------------------------------------------------------------------------------------------------------|---------------------|
| <b><i>Escherichia coli</i></b>                      |                                                                                                                                                            |                     |
| <i>E. coli</i> DH5 $\alpha$                         | F- $\phi$ 80dlacZ $\Delta$ (lacZYA-argF) U169<br>deoRsupE44 $\Delta$ lacU169 (f80lacZDM15) hsdR17 recA1<br>endA1 (rk- mk+) supE44gyrA96 thi-1 gyrA69 relA1 | 42                  |
| <i>E. coli</i> MG 1655                              | F lambda- ilvG-rfb-50rpH-1                                                                                                                                 | 43                  |
| <i>E. coli</i> MG 1655 (pXMJ19)                     | <i>E. coli</i> MG 1655 carrying the vector pXMJ19                                                                                                          | 8                   |
| <i>E. coli</i> MG1655 (pXMJ19_ <i>mCherryEA</i> )   | <i>E. coli</i> MG 1655 carrying a derivative of pXMJ19 for<br>IPTG-inducible <i>mCherryEA</i> expression                                                   | 8                   |
| <b><i>Corynebacterium glutamicum</i></b>            |                                                                                                                                                            |                     |
| <b>ATCC 13032</b>                                   |                                                                                                                                                            |                     |
| <i>C. glutamicum</i> (pEKEx2)                       | <i>C. glutamicum</i> WT carrying the shuttle vector pEKEx2                                                                                                 | This study          |
| <i>C. glutamicum</i> (pEKEx2_ <i>low_mCherry</i> )  | <i>C. glutamicum</i> WT carrying a derivative of the<br>shuttle vector pEKEx2 for IPTG inducible expression<br>of the <i>mCherry</i> gene                  | This study          |
| <i>C. glutamicum</i> (pEKEx2_ <i>high_mCherry</i> ) | <i>C. glutamicum</i> WT carrying a derivative of the<br>shuttle vector pEKEx2 for IPTG inducible expression<br>of the <i>mCherry</i> gene                  | This study          |
| <i>C. glutamicum</i> WT_Mrx1-roGFP2                 | <i>C. glutamicum</i> WT with integrated <i>P<sub>uvr</sub>-mrx1-roGFP2</i>                                                                                 | 34                  |

into the intergenic region of *cg1121-cg1122*

|                                                        |                                                                                                                                                                                                                                              |              |
|--------------------------------------------------------|----------------------------------------------------------------------------------------------------------------------------------------------------------------------------------------------------------------------------------------------|--------------|
| <i>C. glutamicum</i> $\Delta$ <i>mshC</i> _Mrx1-roGFP2 | <i>C. glutamicum</i> WT deletion of <i>mshC</i> and integrated <i>P<sub>urf</sub>-mrx1-roGFP2</i> into the intergenic region of <i>cg1121-cg1122</i>                                                                                         | 34           |
| <b><i>S. cerevisiae</i></b><br><b>CEN.PK113-7D</b>     | <b>Wild type</b>                                                                                                                                                                                                                             | 23           |
| <i>S. cerevisiae</i> (TDH3p-yeGFP_XII-1)               | <i>S. cerevisiae</i> with integrated <i>TDH3p-yeGFP-CYC1t</i> and <i>NatMX</i> resistance cassette into the intergenic integration site <i>XII-1</i>                                                                                         | This study   |
| <i>S. cerevisiae</i> (PDA1p-yeGFP_XII-1)               | <i>S. cerevisiae</i> with integrated <i>PDA1p-yeGFP-CYC1t</i> and <i>NatMX</i> resistance cassette into the intergenic integration site <i>XII-1</i>                                                                                         | This study   |
| <b>Plasmids</b>                                        |                                                                                                                                                                                                                                              |              |
| pEKEx2                                                 | Expression vector; <i>ptac lacI<sup>q</sup> Km<sup>r</sup></i>                                                                                                                                                                               | 45           |
| pXMJ19                                                 | Expression vector; <i>ptac lacI<sup>q</sup> Cam<sup>r</sup></i>                                                                                                                                                                              | 46           |
| pEKEx2_low_ <i>mCherry</i>                             | pEKEx2 derivative for IPTG-inducible <i>mCherry</i> gene expression. Upstream of <i>mCherry</i> a weak RBS was inserted.                                                                                                                     | This study   |
| pEKEx2_high_ <i>mCherry</i>                            | pEKEx2 derivative for IPTG-inducible <i>mCherry</i> gene expression. Upstream of <i>mCherry</i> a high RBS including a spacer of 6 nt was inserted. This RBS-spacer combination was reported as strong RBS by Shi et al. 2018. <sup>47</sup> | This study   |
| pXMJ19_ <i>mCherryEA</i>                               | pXMJ19 derivative for IPTG-inducible <i>mCherryEA</i> gene expression                                                                                                                                                                        | <sup>8</sup> |
| pCfB2197                                               | EasyClone system-based yeast integrative vector carrying loxP-flanked <i>natMX</i> marker, integration into <i>S. cerevisiae</i> XII-1 chromosomal location, USER site for cloning amp resistance.                                           | 48           |
| pLK0106                                                | pCfB2197 containing yeGFP gene under control of PDA1 promoter.                                                                                                                                                                               | This study   |
| pLK0107                                                | pCfB2197 containing yeGFP gene under control of TDH3 promoter.                                                                                                                                                                               | This study   |

506

507

## 508 **Strain construction**

509 The two plasmids pEKEx2\_low\_mCherry and pEKEx2\_high\_mCherry were assembled *via* Gibson cloning  
510 using the Gibson Assembly® Master Mix (NEB, USA) according to the manufacturer's instructions. For his  
511 purpose pEKEx2 was first linearized using SacI (NEB, USA). The gene for mCherry was amplified by PCR  
512 using the primer pairs low\_mCherry\_fw and low\_mCherry\_rev (Table S1) or high\_mCherry\_fw and  
513 high\_mCherry\_rev for pEKEx2\_low\_mCherry and pEKEx2\_high\_mCherry, respectively. All plasmids were  
514 introduced into competent *E. coli* DH5α and analyzed *via* sequencing prior to further use.  
515 Transformation of electrocompetent *C. glutamicum* cells and strain validation were performed as  
516 described previously<sup>49</sup>.

517 To construct the two plasmids pLK0106 and pLK0107 for yeast, DNA fragments constituting the weak  
518 PDA1 promoter or the strong TDH3 promoter<sup>24</sup> and the yeGFP open reading frame<sup>50</sup> were synthesized  
519 as double-stranded gene fragments (Twist Bioscience). The integrative vector pCfB2197 from the  
520 EasyClone 2.0 toolkit was used for plasmid construction, which allowed for selection in prototrophic  
521 strains<sup>48</sup>. Briefly, the vector was linearized by digestion with *AsiSI* (Life Technologies) restriction  
522 endonuclease and nicked with *Nb.BsmI* (New England BioLabs). Synthetic DNA fragments were PCR-  
523 amplified - using forward primer FW\_USER\_TDH3 or FW\_USER\_PDA1 combined with reverse primer  
524 RV\_USER\_yeGFP - and subsequently cloned into the linearized vector backbone by uracil-excision based  
525 (USER) cloning technique<sup>51,52</sup>. Plasmids were transformed into *E. coli* for storage and amplification.  
526 Correct plasmid assembly was verified by PCR and Sanger sequencing (Eurofins Genomics) using primers  
527 ADH1\_test\_fw and CYC1\_test\_rv. Constructed integrative vectors (pLK0106 and pLK0107) were *NotI*  
528 (Life Technologies) digested to capture the linear fragments for integration. *S. cerevisiae* was  
529 transformed as previously described<sup>53</sup>. For genetic integration of cassettes, 1 μg of linear DNA was  
530 transformed into yeast for integration into the XII-1 chromosomal integration site<sup>54</sup>. Cells were plated  
531 onto selective YPD plates and colonies were re-streaked on selective plates. Genomic DNA was

532 extracted as previously described<sup>55</sup>, and integration verified by PCR using XII-1\_up and XII-1\_down. All  
533 oligonucleotides used in this study can be found in the supplementary material (Table S1).

534

### 535 **Fluorescence analysis**

536 Fluorescence measurements of liquid cultures were conducted in black clear-bottomed 96-well  
537 microplates (Greiner Bio-One, Austria) using a SpectraMax iD3 multi-mode plate reader (Molecular  
538 Devices LLC, U.S.A). For fluorescence analysis of the fluorescent protein mCherry, endpoint  
539 measurements were recorded by setting the excitation wavelength at 580 nm and the emission  
540 wavelength at 620 nm. For liquid cultures, fluorescence intensities were normalized to the optical  
541 density measured at 600 nm ( $OD_{600}$ ) using transparent flat-bottomed 96-well microplates (Greiner bio-  
542 one B.V., Netherlands). Prior to measurements of liquid cultures, cells were washed and four times  
543 concentrated.

544 For fluorescence analysis of the pH-sensitive protein mCherryEA, excitation scans were recorded by  
545 setting the excitation wavelength between 400 nm and 590 nm and the emission wavelength at 630 nm.  
546 For ratiometric analysis of the biosensor signal, the emission maxima obtained upon an excitation at  
547 454 nm and 580 nm were taken and the corresponding biosensor ratio was calculated by dividing the  
548 former emission intensity by the latter as recently described<sup>8</sup>. For fluorescence analysis of the redox  
549 biosensor protein Mrx1-roGFP2, the calculation of Exc. 380 nm/ Exc. 470 nm (Em. 510 nm) was used for  
550 the determination of the biosensor ratio as recently described<sup>16</sup>. For determination of the biosensor  
551 oxidation degree (OxD), biosensor ratios from untreated samples were normalized to fully reduced  
552 (100 mM Dithiothreitol (DTT) in PBS buffer; pH 7.0) or oxidized (100 mM Natriumhypochlorite (NaOCl) in  
553 PBS buffer, pH 7.0) samples according to equation1. Here,  $I_{380_{\text{sample}}}$  and  $I_{470_{\text{sample}}}$  represent the

554 measured fluorescence intensities received for an excitation at 380 nm and 470 nm, respectively. Fully  
555 reduced and oxidized controls are given by  $I_{380_{red}}$ ,  $I_{470_{red}}$  and  $I_{380_{ox}}$ ,  $I_{470_{ox}}$ , respectively.

$$OxD = \frac{I_{380_{sample}} \times I_{470_{red}} - I_{380_{red}} \times I_{470_{sample}}}{I_{380_{sample}} \times I_{470_{red}} - I_{380_{sample}} \times I_{470_{ox}} + I_{380_{ox}} \times I_{470_{sample}} - I_{380_{red}} \times I_{470_{sample}}} \quad (1)$$

556

557

### 558 **Microplate reader-based analysis of sensor signals in colonies on agar plates**

559 Prior to robotic spotting of cell cultures, wells of 96-well microtiter plates (Greiner bio-one B.V.,  
560 Netherlands) were filled with 200  $\mu$ L overnight culture adjusted to an OD<sub>600</sub> of 1 in the respective media.  
561 For dilution series, the OD<sub>600</sub> was set to 10 and 1:10 dilutions prepared in microtiter plates. The working  
562 plate (96-well plate) was used as a source plate for robotic spotting using a ROTOR HDA benchtop robot  
563 (Singer Instruments, United Kingdom) on rectangular OmniTray plates (Singer Instruments, United  
564 Kingdom) with solidified medium on the target plate as recently described<sup>8</sup>. The OmniTray plates were  
565 prepared by using 50 mL of the respective media supplemented with appropriate antibiotic and IPTG for  
566 biosensor expression if required. Agar plates with spotted cell cultures in an arrayed format were  
567 cultivated for 24 hours (*E. coli* and *S. cerevisiae* strains) or 48 hours for *C. glutamicum* strains if not  
568 otherwise stated. Fluorescence analysis was performed using a SpectraMax iD3 multi-mode plate reader  
569 (Molecular Devices LLC, U.S.A). Prior to fluorescence analysis, the lid from the OmniTray plate was  
570 removed. A 96-well plate scheme was selected for the measurement mode and the wells selected for  
571 targeting the respective colonies arrayed in a 96-well scheme on the agar plates. Measurement height  
572 was set to 5 mm and measurements were performed at ambient temperature.

573

574

## 575 **Fluorescence imaging of arrayed colonies**

576 Fluorescence imaging of microbial colonies on agar plates was carried out using the photo-  
577 documentation system FUSION FX (Vilber Lourmat, France) and the FUSION FX EVOLUTION-CAPT  
578 software (Vilber Lourmat) for image analyses. For fluorescence analysis of the fluorescent protein  
579 mCherry, the FUSION FX was equipped with a capsule for excitation at 530 nm and an emission filter at  
580 595 nm. For yeGFP analysis a capsule for excitation at 480 nm and a filter for emission 530 nm were  
581 used. Exposure time was set to 800 msec if not stated otherwise. Biosensor signals from the pH-  
582 sensitive protein mCherryEA were measured using the FUSION FX as recently described <sup>8</sup>. For  
583 fluorescence analysis using the Phenobooth (Singer Instruments, United Kingdom), the blue channel was  
584 selected for excitation (470 nm) and the emission intensity measured using a GFP filter (527 nm/  
585 20 nm).

586

## 587 **White light imaging and determination of colony sizes**

588 White light images were captured using the Phenobooth (Singer Instruments, United Kingdom). If  
589 required, images were processed prior to analyzing the images using Cellprofiler 4 (version 4.0.7) <sup>56</sup>. In  
590 order to determine colony sizes, the respective images were analyzed *via* the Python toolbox Pyphe <sup>57</sup>.

591

## 592 **Statistical analysis**

593 Biosensor signals were analyzed using one-way variance (ANOVA) followed by Tukey's test. The  
594 respective analysis was performed using Python 3 <sup>58</sup>, and Pandas <sup>59</sup> was used to handle data frames.  
595 ANOVA was performed using the `ols()` and `anova_lm()` function of the `statsmodels` package <sup>60</sup>. Tukey's

596 test was performed using `tukey_hsd()` function of the `bioinfokit` package <sup>61</sup>. Differences were considered  
597 significant when  $p\text{-value} < 0.05$ . All data were plotted and visualized using the software Origin.

## 598 **Abbreviations**

|        |                                              |
|--------|----------------------------------------------|
| CTAB   | Cetyltrimethylammonium bromide               |
| DTT    | Dithiothreitol                               |
| EV     | Empty vector                                 |
| FRP    | Fluorescent reporter protein                 |
| GFP    | Green fluorescent protein                    |
| IPTG   | Isopropyl $\beta$ -d-1-thiogalactopyranoside |
| OD     | Optical density                              |
| OxD    | Oxidation degree                             |
| RBS    | Ribosomal binding site                       |
| RFLU   | Relative fluorescence units                  |
| roGFP2 | Redox sensitive GFP2                         |
| TFB    | Transcription factor-based biosensor         |
| WT     | Wild type                                    |

599

## 600 **Credit author statement**

601 **Fabian S. F. Hartmann:** Conceptualization; Data curation, Formal analysis, Investigation, Methodology,  
602 Validation, Visualization, Writing of original draft; Writing-review & editing; **Tamara Weiß:**  
603 Conceptualization; Data curation, Formal analysis, Investigation, Methodology, Validation, Visualization,  
604 Writing of original draft; Writing-review & editing; **Louise L. B. Kastberg:** Formal analysis, Investigation,  
605 Writing-review & editing; **Christopher T. Workman:** Funding acquisition, Writing-review & editing; **Gerd**  
606 **M. Seibold:** Conceptualization; Funding acquisition; Supervision; Writing-original draft; Writing-review &  
607 editing.

608

## 609 **Funding**

610 This work received funding by the Novo Nordisk Fonden within the framework of the Fermentation-  
611 based Biomanufacturing Initiative (FBM) (FBM-grant: NNF17SA0031362) and from the Bio Based



612 Industries Joint Undertaking under the European Union's Horizon 2020 research and innovation  
613 program (Grant agreement No 790507).

614

#### 615 **Availability of data and materials**

616 All data generated and analyzed during this study are included in this article and its additional files. Raw  
617 datasets are available from the corresponding author on reasonable request.

618

#### 619 **Conflict of Interest**

620 The authors declare that the research was conducted in the absence of any commercial or financial  
621 relationships that could be construed as a potential conflict of interest.

622

#### 623 **Acknowledgment**

624 We would like to thank the Fermentation Core at DTU Bioengineering for excellent technical support.

625

#### 626 **References**

- 627 (1) French, S.; Coutts, B. E.; Brown, E. D. Open-Source High-Throughput Phenomics of Bacterial  
628 Promoter-Reporter Strains. *Cell Syst.* **2018**, *7* (3), 339–346.e3.  
629 <https://doi.org/10.1016/j.cels.2018.07.004>.
- 630 (2) Nichols, R. J.; Sen, S.; Choo, Y. J.; Beltrao, P.; Zietek, M.; Chaba, R.; Lee, S.; Kazmierczak, K. M.;  
631 Lee, K. J.; Wong, A.; Shales, M.; Lovett, S.; Winkler, M. E.; Krogan, N. J.; Typas, A.; Gross, C. A.  
632 Phenotypic Landscape of a Bacterial Cell. *Cell* **2011**, *144* (1), 143–156.  
633 <https://doi.org/10.1016/j.cell.2010.11.052>.
- 634 (3) Liu, W.; Jiang, R. Combinatorial and High-Throughput Screening Approaches for Strain  
635 Engineering. *Appl. Microbiol. Biotechnol.* **2015**, *99* (5), 2093–2104.  
636 <https://doi.org/10.1007/s00253-015-6400-0>.
- 637 (4) Zeng, W.; Guo, L.; Xu, S.; Chen, J.; Zhou, J. High-Throughput Screening Technology in Industrial  
638 Biotechnology. *Trends Biotechnol.* **2020**, *38* (8), 888–906.  
639 <https://doi.org/10.1016/j.tibtech.2020.01.001>.
- 640 (5) Tanaka, Y.; Sasaki, N.; Ohmiya, A. Biosynthesis of Plant Pigments: Anthocyanins, Betalains and  
641 Carotenoids. *Plant J.* **2008**, *54* (4), 733–749. <https://doi.org/10.1111/j.1365-313X.2008.03447.x>.

- 642 (6) Peters, J. M.; Colavin, A.; Shi, H.; Czarny, T. L.; Larson, M. H.; Wong, S.; Hawkins, J. S.; Lu, C. H. S.;  
643 Koo, B. M.; Marta, E.; Shiver, A. L.; Whitehead, E. H.; Weissman, J. S.; Brown, E. D.; Qi, L. S.;  
644 Huang, K. C.; Gross, C. A. A Comprehensive, CRISPR-Based Functional Analysis of Essential Genes  
645 in Bacteria. *Cell* **2016**, *165* (6), 1493–1506. <https://doi.org/10.1016/j.cell.2016.05.003>.
- 646 (7) Kaczmarek, J. A.; Prather, K. L. J. Effective Use of Biosensors for High-Throughput Library  
647 Screening for Metabolite Production. *J. Ind. Microbiol. Biotechnol.* **2021**, *48* (9–10).  
648 <https://doi.org/10.1093/jimb/kuab049>.
- 649 (8) Hartmann, F. S. F.; Weiß, T.; Shen, J.; Smahajcsik, D.; Savickas, S.; Seibold, G. M. Visualizing the pH  
650 in *Escherichia coli* Colonies via the Sensor Protein mCherryEA Allows High-Throughput Screening  
651 of Mutant Libraries. *mSystems* **2022**, 2021.07.08.451719.  
652 <https://doi.org/doi/10.1128/msystems.00219-22>.
- 653 (9) Schallmeyer, M.; Frunzke, J.; Eggeling, L.; Marienhagen, J. Looking for the Pick of the Bunch: High-  
654 Throughput Screening of Producing Microorganisms with Biosensors. *Curr. Opin. Biotechnol.*  
655 **2014**, *26*, 148–154. <https://doi.org/10.1016/j.copbio.2014.01.005>.
- 656 (10) Ding, N.; Zhou, S.; Deng, Y. Transcription-Factor-Based Biosensor Engineering for Applications in  
657 Synthetic Biology. *ACS Synth. Biol.* **2021**, *10* (5). <https://doi.org/10.1021/acssynbio.0c00252>.
- 658 (11) Mahr, R.; Frunzke, J. Transcription Factor-Based Biosensors in Biotechnology: Current State and  
659 Future Prospects. *Appl. Microbiol. Biotechnol.* **2016**, *100* (1), 79–90.  
660 <https://doi.org/10.1007/s00253-015-7090-3>.
- 661 (12) Bermejo, C.; Haerizadeh, F.; Takanaga, H.; Chermak, D.; Frommer, W. B. Optical Sensors for  
662 Measuring Dynamic Changes of Cytosolic Metabolite Levels in Yeast. *Nat. Protoc.* **2011**, *6* (11),  
663 1806–1817. <https://doi.org/10.1038/nprot.2011.391>.
- 664 (13) Martynov, V. I.; Pakhomov, A. A.; Deyev, I. E.; Petrenko, A. G. Genetically Encoded Fluorescent  
665 Indicators for Live Cell pH Imaging. *Biochim. Biophys. Acta - Gen. Subj.* **2018**, *1862* (12), 2924–  
666 2939. <https://doi.org/10.1016/j.bbagen.2018.09.013>.
- 667 (14) Martinez, K. A.; Kitko, R. D.; Mershon, J. P.; Adcox, H. E.; Malek, K. A.; Berkmen, M. B.;  
668 Slonczewski, J. L. Cytoplasmic pH Response to Acid Stress in Individual Cells of *Escherichia coli* and  
669 *Bacillus subtilis* Observed by Fluorescence Ratio Imaging Microscopy. *Appl. Environ. Microbiol.*  
670 **2012**, *78* (10), 3706–3714. <https://doi.org/10.1128/AEM.00354-12>.
- 671 (15) Depaoli, M. R.; Bischof, H.; Eroglu, E.; Burgstaller, S.; Ramadani-Muja, J.; Rauter, T.; Schinagl, M.;  
672 Waldeck-Weiermair, M.; Hay, J. C.; Graier, W. F.; Malli, R. Live Cell Imaging of Signaling and  
673 Metabolic Activities. *Pharmacol. Ther.* **2019**, *202*, 98–119.  
674 <https://doi.org/10.1016/j.pharmthera.2019.06.003>.
- 675 (16) Hartmann, F. S. F.; Clermont, L.; Tung, Q. N.; Antelmann, H.; Seibold, G. M. The Industrial  
676 Organism *Corynebacterium glutamicum* Requires Mycothiol as Antioxidant to Resist against  
677 Oxidative Stress in Bioreactor Cultivations. *Antioxidants* **2020**, *9* (10), 1–13.  
678 <https://doi.org/10.3390/antiox9100969>.
- 679 (17) Goldbeck, O.; Eck, A. W.; Seibold, G. M. Real Time Monitoring of NADPH Concentrations in  
680 *Corynebacterium glutamicum* and *Escherichia coli* via the Genetically Encoded Sensor mBFP.  
681 *Front. Microbiol.* **2018**, *9* (OCT), 1–10. <https://doi.org/10.3389/fmicb.2018.02564>.
- 682 (18) Hartmann, F. S. F.; Anastasiou, I.; Weiß, T.; Lkhaasuren, T. Combined Sensor-Based Monitoring of

- 683 Mycothiol Redox Potential and DNA-Damage Response in *Corynebacterium glutamicum*. *bioRxiv*  
684 **2022**. <https://doi.org/https://doi.org/10.1101/2022.07.25.501298>.
- 685 (19) Aguiar-Cervera, J. E.; Delneri, D.; Severn, O. A High-throughput Screening Method for the  
686 Discovery of *Saccharomyces* and Non- *Saccharomyces* Yeasts with Potential in the Brewing  
687 Industry . *Eng. Biol.* **2021**, *5* (3), 72–80. <https://doi.org/10.1049/enb2.12013>.
- 688 (20) Daniel, B.; Lawless, C. Modelling Competition for Nutrients between Microbial Populations  
689 Growing on a Solid Agar Surface. *bioRxiv* **2017**. <https://doi.org/10.1101/086835>.
- 690 (21) Hennessy, R. C.; Stougaard, P.; Olsson, S. A Microplate Reader-Based System for Visualizing  
691 Transcriptional Activity during *in Vivo* Microbial Interactions in Space and Time. *Sci. Rep.* **2017**, *7*  
692 (1). <https://doi.org/10.1038/s41598-017-00296-4>.
- 693 (22) Göttert, H.; Mattiazzi Usaj, M.; Rosebrock, A. P.; Andrews, B. J. Reporter-Based Synthetic Genetic  
694 Array Analysis: A Functional Genomics Approach for Investigating Transcript or Protein  
695 Abundance Using Fluorescent Proteins in *Saccharomyces cerevisiae*. In *Methods in Molecular*  
696 *Biology*; 2018; Vol. 1672. [https://doi.org/10.1007/978-1-4939-7306-4\\_40](https://doi.org/10.1007/978-1-4939-7306-4_40).
- 697 (23) Entian, K. D.; Kötter, P. 25 Yeast Genetic Strain and Plasmid Collections. *Methods Microbiol.* **2007**,  
698 *36* (06), 629–666. [https://doi.org/10.1016/S0580-9517\(06\)36025-4](https://doi.org/10.1016/S0580-9517(06)36025-4).
- 699 (24) Peng, B.; Williams, T. C.; Henry, M.; Nielsen, L. K.; Vickers, C. E. Controlling Heterologous Gene  
700 Expression in Yeast Cell Factories on Different Carbon Substrates and across the Diauxic Shift: A  
701 Comparison of Yeast Promoter Activities. *Microb. Cell Fact.* **2015**, *14* (1), 1–11.  
702 <https://doi.org/10.1186/s12934-015-0278-5>.
- 703 (25) Rajendran, M.; Claywell, B.; Haynes, E. P.; Scales, U.; Henning, C. K.; Tantama, M. Imaging pH  
704 Dynamics Simultaneously in Two Cellular Compartments Using a Ratiometric pH-Sensitive  
705 Mutant of mCherry. *ACS Omega* **2018**, *3* (8). <https://doi.org/10.1021/acsomega.8b00655>.
- 706 (26) Wilks, J. C.; Slonczewski, J. L. pH of the Cytoplasm and Periplasm of *Escherichia coli*: Rapid  
707 Measurement by Green Fluorescent Protein Fluorimetry. *J. Bacteriol.* **2007**, *189* (15), 5601–5607.  
708 <https://doi.org/10.1128/JB.00615-07>.
- 709 (27) Salmond, C. V.; Kroll, R. G.; Booth, I. R. The Effect of Food Preservatives on pH Homeostasis in  
710 *Escherichia coli*. *J. Gen. Microbiol.* **1984**, *130* (11), 2845–2850.  
711 <https://doi.org/10.1099/00221287-130-11-2845>.
- 712 (28) Padan, E.; Zilberstein, D.; Schuldiner, S. pH Homeostasis in Bacteria. *BBA - Rev. Biomembr.* **1981**,  
713 *650* (2–3), 151–166. [https://doi.org/10.1016/0304-4157\(81\)90004-6](https://doi.org/10.1016/0304-4157(81)90004-6).
- 714 (29) Piatkevich, K. D.; Malashkevich, V. N.; Almo, S. C.; Verkhusha, V. V. Engineering ESPT Pathways  
715 Based on Structural Analysis of LSSmKate Red Fluorescent Proteins with Large Stokes Shift. *J. Am.*  
716 *Chem. Soc.* **2010**, *132* (31), 10762–10770. <https://doi.org/10.1021/ja101974k>.
- 717 (30) Hartmann, F. S. F.; Anastasiou, I.; Weiß, T.; Shen, J.; Seibold, G. M. Impedance Flow Cytometry for  
718 Viability Analysis of *Corynebacterium glutamicum*. *J. Microbiol. Methods* **2021**, *191* (September),  
719 106347. <https://doi.org/10.1016/j.mimet.2021.106347>.
- 720 (31) Reyes, A. M.; Pedre, B.; De Armas, M. I.; Tossounian, M. A.; Radi, R.; Messens, J.; Trujillo, M.  
721 Chemistry and Redox Biology of Mycothiol. *Antioxidants Redox Signal.* **2018**, *28* (6), 487–504.  
722 <https://doi.org/10.1089/ars.2017.7074>.

- 723 (32) Chi, B. K.; Busche, T.; Van Laer, K.; Bäsell, K.; Becher, D.; Clermont, L.; Seibold, G. M.; Persicke, M.;  
724 Kalinowski, J.; Messens, J.; Antelmann, H. Protein S-Mycothiolation Functions as Redox-Switch  
725 and Thiol Protection Mechanism in *Corynebacterium glutamicum* under Hypochlorite Stress.  
726 *Antioxidants Redox Signal.* **2014**, *20* (4), 589–605. <https://doi.org/10.1089/ars.2013.5423>.
- 727 (33) Liu, Y. B.; Long, M. X.; Yin, Y. J.; Si, M. R.; Zhang, L.; Lu, Z. Q.; Wang, Y.; Shen, X. H. Physiological  
728 Roles of Mycothiol in Detoxification and Tolerance to Multiple Poisonous Chemicals in  
729 *Corynebacterium glutamicum*. *Arch. Microbiol.* **2013**, *195* (6), 419–429.  
730 <https://doi.org/10.1007/s00203-013-0889-3>.
- 731 (34) Tung, Q. N.; Loi, V. Van; Busche, T.; Nerlich, A.; Mieth, M.; Milse, J.; Kalinowski, J.; Hocke, A. C.;  
732 Antelmann, H. Stable Integration of the Mrx1-roGFP2 Biosensor to Monitor Dynamic Changes of  
733 the Mycothiol Redox Potential in *Corynebacterium glutamicum*. *Redox Biol.* **2019**, *20*, 514–525.  
734 <https://doi.org/10.1016/j.redox.2018.11.012>.
- 735 (35) Si, M.; Xu, Y.; Wang, T.; Long, M.; Ding, W.; Chen, C.; Guan, X.; Liu, Y.; Wang, Y.; Shen, X.; Liu, S. J.  
736 Functional Characterization of a Mycothiol Peroxidase in *Corynebacterium glutamicum* That Uses  
737 Both Mycoredoxin and Thioredoxin Reducing Systems in the Response to Oxidative Stress.  
738 *Biochem. J.* **2015**, *469* (1), 45–57. <https://doi.org/10.1042/BJ20141080>.
- 739 (36) Pedre, B.; Van Molle, I.; Villadangos, A. F.; Wahni, K.; Vertommen, D.; Turell, L.; Erdogan, H.;  
740 Mateos, L. M.; Messens, J. The *Corynebacterium glutamicum* Mycothiol Peroxidase Is a Reactive  
741 Oxygen Species-Scavenging Enzyme That Shows Promiscuity in Thiol Redox Control. *Mol.*  
742 *Microbiol.* **2015**, *96* (6), 1176–1191. <https://doi.org/10.1111/mmi.12998>.
- 743 (37) Tossounian, M. A.; Pedre, B.; Wahni, K.; Erdogan, H.; Vertommen, D.; Van Molle, I.; Messens, J.  
744 *Corynebacterium diphtheriae* Methionine Sulfoxide Reductase Exploits a Unique Mycothiol  
745 Redox Relay Mechanism. *J. Biol. Chem.* **2015**, *290* (18), 11365–11375.  
746 <https://doi.org/10.1074/jbc.M114.632596>.
- 747 (38) Si, M.; Zhao, C.; Zhang, B.; Wei, D.; Chen, K.; Yang, X.; Xiao, H.; Shen, X. Overexpression of  
748 Mycothiol Disulfide Reductase Enhances *Corynebacterium glutamicum* Robustness by  
749 Modulating Cellular Redox Homeostasis and Antioxidant Proteins under Oxidative Stress. *Sci.*  
750 *Rep.* **2016**, *6* (July), 1–14. <https://doi.org/10.1038/srep29491>.
- 751 (39) Navarrete, C.; Estrada, M.; Martínez, J. L. *Debaryomyces hansenii*: An Old Acquaintance for a  
752 Fresh Start in the Era of the Green Biotechnology. *World J. Microbiol. Biotechnol.* **2022**, *38* (6), 1–  
753 10. <https://doi.org/10.1007/s11274-022-03280-x>.
- 754 (40) Hartmann, F. S. F.; Udugama, I. A.; Seibold, G. M.; Sugiyama, H.; Gernaey, K. V. Digital Models in  
755 Biotechnology : Towards Multi-Scale Integration and Implementation. *Biotechnol. Adv.* **2022**, *60*,  
756 108015. <https://doi.org/10.1016/j.biotechadv.2022.108015>.
- 757 (41) Bertani, G. Lysogeny at Mid-Twentieth Century: P1, P2, and Other Experimental Systems. *J.*  
758 *Bacteriol.* **2004**, *186* (3), 595–600. <https://doi.org/10.1128/JB.186.3.595-600.2004>.
- 759 (42) Studier, F. W.; Moffatt, B. A. Use of Bacteriophage T7 RNA Polymerase to Direct Selective High-  
760 Level Expression of Cloned Genes. *J. Mol. Biol.* **1986**, *189* (1), 113–130.  
761 [https://doi.org/10.1016/0022-2836\(86\)90385-2](https://doi.org/10.1016/0022-2836(86)90385-2).
- 762 (43) Blattner, F. R.; Plunkett, G.; Bloch, C. A.; Perna, N. T.; Burland, V.; Riley, M.; Collado-Vides, J.;  
763 Glasner, J. D.; Rode, C. K.; Mayhew, G. F.; Gregor, J.; Davis, N. W.; Kirkpatrick, H. A.; Goeden, M.

- 764 A.; Rose, D. J.; Mau, B.; Shao, Y. The Complete Genome Sequence of *Escherichia coli* K-12. *Science*  
765 (80-. ). **1997**, 277 (5331), 1453–1462. <https://doi.org/10.1126/science.277.5331.1453>.
- 766 (44) Abe, S.; Takayama, K. I.; Kinoshita, S. Taxonomical Studies on Glutamic Acid-Producing Bacteria. *J.*  
767 *Gen. Appl. Microbiol.* **1967**, 13 (3). <https://doi.org/10.2323/jgam.13.279>.
- 768 (45) Eikmanns, B. J.; Kleinertz, E.; Liehl, W.; Sahm, H. A Family of *Corynebacterium glutamicum*/  
769 *Escherichia coli* Expression and Promoter Probing. *Plasmid* **1991**, 102, 93–98.  
770 [https://doi.org/10.1016/0378-1119\(91\)90545-M](https://doi.org/10.1016/0378-1119(91)90545-M).
- 771 (46) Jakoby, M.; Carole-Estelle; Ngouoto-Nkili; Burkovski, A. Construction and Application of New  
772 *Corynebacterium glutamicum* Vectors. *Biotechnol. Tech.* **1999**, 13 (6), 437–441.  
773 <https://doi.org/10.1023/A:1008968419217>.
- 774 (47) Shi, F.; Luan, M.; Li, Y. Ribosomal Binding Site Sequences and Promoters for Expressing Glutamate  
775 Decarboxylase and Producing  $\gamma$ -Aminobutyrate in *Corynebacterium glutamicum*. *AMB Express*  
776 **2018**, 8 (1). <https://doi.org/10.1186/s13568-018-0595-2>.
- 777 (48) Stovicek, V.; Borja, G. M.; Forster, J.; Borodina, I. EasyClone 2.0: Expanded Toolkit of Integrative  
778 Vectors for Stable Gene Expression in Industrial *Saccharomyces cerevisiae* Strains. *J. Ind.*  
779 *Microbiol. Biotechnol.* **2015**, 42 (11), 1519–1531. <https://doi.org/10.1007/s10295-015-1684-8>.
- 780 (49) Van der Rest, M. E.; Lange, C.; Molenaar, D. A Heat Shock Following Electroporation Induces  
781 Highly Efficient Transformation of *Corynebacterium glutamicum* with Xenogeneic Plasmid DNA.  
782 *Appl. Microbiol. Biotechnol.* **1999**, 52 (4). <https://doi.org/10.1007/s002530051557>.
- 783 (50) Cormack, B. P.; Bertram, G.; Egerton, M.; Gow, N. A. R.; Falkow, S.; Brown, A. J. P. Yeast-Enhanced  
784 Green Fluorescent Protein (yEGFP): A Reporter of Gene Expression in *Candida albicans*.  
785 *Microbiology* **1997**, 143 (2), 303–311. <https://doi.org/10.1099/00221287-143-2-303>.
- 786 (51) Nour-Eldin, H. H.; Geu-Flores, F.; Halkier, B. A. USER Cloning and USER Fusion: The Ideal Cloning  
787 Techniques for Small and Big Laboratories. In *Plant Secondary Metabolism Engineering*; 2010;  
788 Vol. 643, pp 185–200. <https://doi.org/10.1007/978-1-60761-723-5>.
- 789 (52) Jensen, N. B.; Strucko, T.; Kildegaard, K. R.; David, F.; Maury, J.; Mortensen, U. H.; Forster, J.;  
790 Nielsen, J.; Borodina, I. EasyClone: Method for Iterative Chromosomal Integration of Multiple  
791 Genes in *Saccharomyces cerevisiae*. *FEMS Yeast Res.* **2014**, 14 (2), 238–248.  
792 <https://doi.org/10.1111/1567-1364.12118>.
- 793 (53) Gietz, R. D.; Schiestl, R. H. High-Efficiency Yeast Transformation Using the LiAc/SS Carrier  
794 DNA/PEG Method. *Nat. Protoc.* **2007**, 2 (1), 31–34. <https://doi.org/10.1038/nprot.2007.13>.
- 795 (54) Mikkelsen, M. D.; Buron, L. D.; Salomonsen, B.; Olsen, C. E.; Hansen, B. G.; Mortensen, U. H.;  
796 Halkier, B. A. Microbial Production of Indolyglucosinolate through Engineering of a Multi-Gene  
797 Pathway in a Versatile Yeast Expression Platform. *Metab. Eng.* **2012**, 14 (2), 104–111.  
798 <https://doi.org/10.1016/j.ymben.2012.01.006>.
- 799 (55) Lööke, M.; Kristjuhan, K.; Kristjuhan, A. Extraction of Genomic DNA from Yeasts for PCR-Based  
800 Applications. *Biotechniques* **2011**, 50 (5), 325–328.  
801 <https://doi.org/10.2144/000113672.EXTRACTION>.
- 802 (56) Stirling, D. R.; Swain-Bowden, M. J.; Lucas, A. M.; Carpenter, A. E.; Cimini, B. A.; Goodman, A.  
803 CellProfiler 4: Improvements in Speed, Utility and Usability. *BMC Bioinformatics* **2021**, 22 (1).

- 804 <https://doi.org/10.1186/s12859-021-04344-9>.
- 805 (57) Kamrad, S.; Rodríguez-López, M.; Cotobal, C.; Correia-Melo, C.; Ralser, M.; Bähler, J. Pyphe, a  
806 Python Toolbox for Assessing Microbial Growth and Cell Viability in High-Throughput Colony  
807 Screens. *Elife* **2020**, *9*. <https://doi.org/10.7554/eLife.55160>.
- 808 (58) Van Rossum, G.; Drake, F. L. *Python 3 Reference Manual*; CreateSpace: Scotts Valley, CA, 2009.
- 809 (59) McKinney, W. Data Structures for Statistical Computing in Python. In Proceedings of the 9th  
810 Python in Science Conference. In *Proceedings of the 9th Python in Science Conference*; 2010.  
811 <https://doi.org/10.25080/majora-92bf1922-00a>.
- 812 (60) Seabold, S.; Perktold, J. Statsmodels: Econometric and Statistical Modeling with Python. In  
813 *Proceedings of the 9th Python in Science Conference*; 2010. <https://doi.org/10.25080/majora-92bf1922-011>.
- 814
- 815 (61) Bedre, R. Reneshbedre/Bioinfokit: Bioinformatics Data Analysis and Visualization Toolkit. Zenodo  
816 2021. <https://doi.org/10.5281/zenodo.4422035>.
- 817
